# Supplementary material for: Molecular Insight into Mycobacterium tuberculosis Resistance to Nitrofuranyl Amides Gained through Metagenomics-like Analysis of Spontaneous Mutants
Source: Pharmaceuticals (Basel). 2022 Sep 12;15(9):1136. doi: 10.3390/ph15091136 (PMC9504009; doi:10.3390/ph15091136)

# Supplementary Data

## Molecular insight into Mycobacterium tuberculosis resistance to nitrofuranyl amides gained through metagenomics-like analysis of spontaneous mutants

Igor Mokrousov<sup>1,7\*</sup>, Ivaylo Slavchev<sup>2</sup>, Natalia Solovieva<sup>3</sup>, Marine Dogonadze<sup>3</sup>, Anna Vyazovaya<sup>1</sup>, Violeta Valcheva<sup>4</sup>, Aleksey Masharsky<sup>5</sup>, Olesya Belopolskaya<sup>5</sup>, Simeon Dimitrov<sup>4</sup>, Viacheslav Zhuravlev<sup>3</sup>, Isabel Portugal<sup>6</sup>, João Perdigão<sup>6</sup>, Georgi M. Dobrikov<sup>2\*</sup>

<sup>1</sup>Laboratory of Molecular Epidemiology and Evolutionary Genetics,  
St Petersburg Pasteur Institute, St Petersburg 197101, Russia

<sup>2</sup>Institute of Organic Chemistry with Centre of Phytochemistry, Bulgarian Academy of Sciences,  
Acad. G. Bonchev str., bl. 9, Sofia 1113, Bulgaria

<sup>3</sup>St. Petersburg Research Institute of Phthisiopulmonology, St. Petersburg 191036, Russia

<sup>4</sup>The Stephan Angeloff Institute of Microbiology, Bulgarian Academy of Sciences,  
Acad. G. Bonchev str., bl. 26, Sofia 1113, Bulgaria

<sup>5</sup>Resource Center "Bio-bank Center", Research Park of St. Petersburg State University,  
St. Petersburg 198504, Russia

<sup>6</sup>iMed.Ulisboa – Instituto de Investigação do Medicamento, Faculdade de Farmácia,  
Universidade de Lisboa, Lisbon, Portugal

<sup>7</sup>Henan International Joint Laboratory of Children's Infectious Diseases,  
Children's Hospital Affiliated to Zhengzhou University, Zhengzhou 450018, China

\* Corresponding authors: Igor Mokrousov, imokrousov@mail.ru  
Georgi Dobrikov, georgi.dobrikov@orgchm.bas.bg

### 1 Chemistry and NMR – general

For thin layer chromatography (TLC) aluminum sheets pre-coated with silica gel 60 F<sub>254</sub> (Merck) were used. Flash column chromatography was carried out using silica gel 60 (0.040–0.063 mm, 230-400 mesh ASTM, Merck). Commercially available solvents for reactions, TLC and column chromatography were used after distillation (and were dried if needed) – water, petroleum ether (PE), dichloromethane (DCM) and methyl *tert*-butyl ether (MTBE). Any fine chemical, whose synthesis is not described or mentioned in the references in this study, is commercially available from Sigma-Aldrich, Fluorochem, Fluka, Acros or Alfa Aesar. Melting temperatures were determined in capillary tubes on an Electrothermal MEL-TEMP 1102D-230 VAC apparatus without corrections. The NMR spectra were recorded on a Bruker Avance II+ 600 spectrometer (600.13 MHz for <sup>1</sup>H and 150.92 MHz for <sup>13</sup>C) and Bruker Neo 600 spectrometer (600.18 MHz for <sup>1</sup>H and 150.92 MHz for <sup>13</sup>C). In case of CDCl<sub>3</sub>, TMS was used as internal standard ( $\delta$ =0.00). For other deuterated solvents <sup>1</sup>H spectra were calibrated to the residual solvent peaks (DMSO-d<sub>6</sub>  $\delta$ =2.50). <sup>13</sup>C spectra were calibrated in all cases to the residual solvent peaks (CDCl<sub>3</sub>  $\delta$ =77.00, DMSO-d<sub>6</sub>  $\delta$ =39.52). <sup>1</sup>H and <sup>13</sup>C NMR data are reported as follows: chemical shift, multiplicity (s = singlet, d = doublet, t = triplet, q = quartet, br = broad, m = multiplet), integration, identification, and coupling constants (in Hz). Singlets in <sup>13</sup>C NMR spectra were not mentioned with “s” in all cases. Mass spectra (MS) were recorded on a Shimadzu Liquid Chromatograph Mass Spectrometer LCMS-2020. Direct MS-regime was applied; each compound was dissolved in MeOH with concentration 1 mg/ml; injection volume 3-5  $\mu$ l; mobile phase – 1% formic acid in MeOH; MS detector with electrospray ionization (ESI). MS spectra are reported as fragmentation in m/z with relative intensities (%). The compound names are in agreement with the IUPAC nomenclature.

## 1.1 Synthesis of target compounds

### 1.1.1 Synthesis of *N*-(4-(diethylamino)phenyl)-5-nitrofuran-2-carboxamide (**8**)

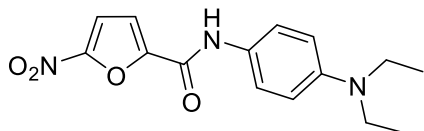

Compound **2** (0.337 g, 2.05 mmol, 1.2 eq.) and Et<sub>3</sub>N were dissolved in 20 ml dry DCM. The solution was cooled to 0°C and acyl chloride **1** (0.300 g, 1.71 mmol, 1.0 eq.) was added at once as a solid. The mixture was stirred at r.t. for 18 h (TLC – DCM:MTBE=20:1), then washed with 1% aq. citric acid and water. The organic phase was dried over anhydr. Na<sub>2</sub>SO<sub>4</sub> and evaporated. Column chromatography: 1) DCM; 2) DCM:MTBE=20:1 – for product. After column the solid product was washed with hot PE and dried *in vacuo* to give 0.423 g (82%) of pure **8** as red crystals. M.p. 151-152°C. <sup>1</sup>H NMR (600.13 MHz, DMSO-*d*<sub>6</sub>, 298 K): δ = 10.36 (br s, 1H, NH), 7.80 (d, 1H, furane CH<sub>arom.</sub>, *J* = 3.9 Hz), 7.56 (d, 1H, furane CH<sub>arom.</sub>, *J* = 3.9 Hz), 7.50 (m, 2H, 2xCH<sub>arom.</sub>), 6.66 (m, 2H, 2xCH<sub>arom.</sub>), 3.32 (q, 4H, 2xCH<sub>2</sub>, *J* = 7.0 Hz), 1.01 (t, 6H, 2xCH<sub>3</sub>, *J* = 7.0 Hz). <sup>13</sup>C NMR (150.92 MHz, DMSO-*d*<sub>6</sub>, 298 K): δ = 153.84 (1C, C=O), 151.61 (1C, quaternary C<sub>arom.</sub>), 148.61 (1C, quaternary C<sub>arom.</sub>), 144.82 (1C, quaternary C<sub>arom.</sub>), 126.08 (1C, quaternary C<sub>arom.</sub>), 122.47 (2C, CH<sub>arom.</sub>), 115.74 (1C, CH<sub>arom.</sub>), 113.63 (1C, CH<sub>arom.</sub>), 111.50 (2C, CH<sub>arom.</sub>), 43.74 (2C, N-CH<sub>2</sub>), 12.44 (2C, CH<sub>3</sub>). MS (ESI+) *m/z* (rel. int. %): 304 (M+H, 100), 358 (M+Na+MeOH, 98). (ESI-) *m/z* (rel. int. %): 302 (M-H, 100). Anal. calcd. for C<sub>15</sub>H<sub>17</sub>N<sub>3</sub>O<sub>4</sub> (303.32): C, 59.40; H, 5.65; N, 13.85. Found: C, 59.47; H, 5.60; N, 13.89 %.

### 1.1.2 Synthesis of *N*-(2-((1*R*,2*R*,4*S*)-2-hydroxy-1,3,3-trimethylbicyclo[2.2.1]heptan-2-yl)ethyl)-5-nitrofuran-2-carboxamide (**9**)

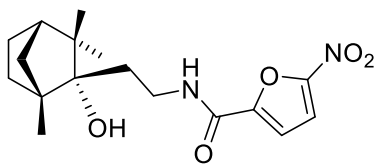

Aminoalcohol **3** (0.340 g, 1.72 mmol, 1.1 eq.) and Et<sub>3</sub>N (0.33 ml, 2.35 ml, 1.5 eq.) were dissolved in 20 ml dry DCM and cooled to 5°C. Then acyl chloride **1** was added at once and stirred for 20 h at r.t. Reaction mixture was washed with 1% aq. citric acid and water, dried over anhydr. Na<sub>2</sub>SO<sub>4</sub> and evaporated. Column chromatography: 1) DCM; 2) DCM:MTBE = 50:1 – for product. After column the solid product was washed with hot PE and dried *in vacuo* to give pure **9** (0.345 g, 65%) as pale yellow crystals. M.p. 134-135°C. <sup>1</sup>H NMR (600.13 MHz, CDCl<sub>3</sub>, 298 K): δ = 7.36 (d, 1H, furane CH, *J* = 3.8 Hz), 7.30 (apparent br. s, 1H, NH), 7.23 (d, 1H, furane CH, *J* = 3.8 Hz), 3.75 (m, 1H, CH<sub>2</sub>CH<sub>2</sub>NH), 3.53 (m, 1H, CH<sub>2</sub>CH<sub>2</sub>NH), 2.08 (br s, 1H, OH), 1.98 (m, 1H, CH<sub>2</sub>CH<sub>2</sub>NH), 1.75-1.85 (m, 2H, CH<sub>2</sub>), 1.71 (m, 1H, CH<sub>2</sub>), 1.66 (m, 1H, CH), 1.60 (m, 1H, CH<sub>2</sub>), 1.47 (tt, 1H, CH<sub>2</sub>, *J* = 12.8, 4.7 Hz), 1.11-1.16 (m, 2H, CH<sub>2</sub>), 1.09 (s, CH<sub>3</sub>), 1.04 (s, CH<sub>3</sub>), 1.02 (s, CH<sub>3</sub>). <sup>13</sup>C NMR (150.92 MHz, CDCl<sub>3</sub>, 298 K): δ = 156.10 (1C, C=O), 151.12 (1C, quaternary furane C), 148.41 (1C, quaternary furane C), 115.61 (1C, furane CH), 112.47 (1C, furane CH), 81.80 (1C, quaternary aliphatic C-OH), 52.72 (1C, quaternary aliphatic C), 49.75 (1C, aliphatic CH), 44.21 (1C, quaternary aliphatic C), 40.90 (1C, CH<sub>2</sub>), 36.97 (1C, CH<sub>2</sub>CH<sub>2</sub>NH), 35.43 (1C, CH<sub>2</sub>), 30.23 (1C, CH<sub>2</sub>), 27.88 (1C, CH<sub>3</sub>), 24.78 (1C, CH<sub>2</sub>), 22.54 (1C, CH<sub>3</sub>), 18.00 (1C, CH<sub>3</sub>). MS (ESI+) *m/z* (rel. int. %): 376 (M+H+K, 72), 391 (M+Na+MeOH, 56). MS (ESI-) *m/z* (rel. int. %): 335 (M-H, 100), 381 (M+HCOO, 18). Anal. calcd. for C<sub>17</sub>H<sub>24</sub>N<sub>2</sub>O<sub>5</sub> (336.39): C, 60.70; H, 7.19; N, 8.33. Found: C, 60.66; H, 7.24; N, 8.38%.

### 1.1.3 Synthesis of *N*-(2-(2-methyl-5-nitro-1*H*-imidazol-1-yl)ethyl)-5-nitrofuran-2-carboxamide (**10**)

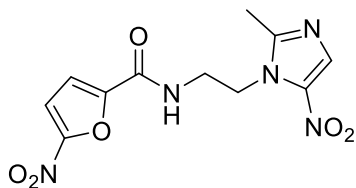

Compound **4** (as dihydrochloride salt, 0.670 g, 2.56 mmol, 1.5 eq.) was suspended in 25 ml dry DCM. Then Et<sub>3</sub>N (1.07 ml, 7.70 mmol, 5.4 eq.) and mol. sieve (4Å) were added, cooled to 5°C and stirred for 30 min until clear solution was obtained. Then acyl chloride **1** (0.300 g, 1.71 mmol, 1.0 eq.) was added at once and stirred for 20 h at r.t. Reaction mixture was diluted with 100 ml CHCl<sub>3</sub> and filtered through celite pad. The organic phase was washed with water, checked by TLC (DCM:MTBE = 5:1), dried over anhydr. K<sub>2</sub>CO<sub>3</sub> and evaporated. The crude product was purified by column chromatography – 1) DCM; 2) DCM:MTBE = 4:1 for product. After column the solid product was washed with hot PE and dried *in vacuo* to give 0.222 g (42%) of pure **10** as pale yellow crystals. M.p. 205-206°C. <sup>1</sup>H NMR (600.13 MHz, DMSO-*d*<sub>6</sub>, 298 K): δ = 9.08 (t, 1H, NH, *J* = 6.1 Hz), 8.04 (s, 1H, imidazole CH), 7.74 (d, 1H, furane CH, *J* = 3.9 Hz), 7.35 (d, 1H, furane CH, *J* = 3.9 Hz), 4.43 (t, 2H, NH-CH<sub>2</sub>-CH<sub>2</sub>, *J* = 5.9 Hz), 3.65 (q, 2H, NH-CH<sub>2</sub>-CH<sub>2</sub>, *J* = 6.1 Hz), 2.38 (s, 3H, CH<sub>3</sub>). <sup>13</sup>C NMR (150.92 MHz, DMSO-*d*<sub>6</sub>, 298 K): δ = 156.47 (1C, C=O), 151.54 (1C, quaternary C<sub>arom.</sub>), 151.35 (1C, quaternary C<sub>arom.</sub>), 147.64 (1C, quaternary C<sub>arom.</sub>), 138.62 (1C, quaternary C<sub>arom.</sub>), 133.24 (1C, imidazole CH), 115.91 (1C, furane CH), 113.44 (1C, furane CH), 45.16 (1C, NH-CH<sub>2</sub>-CH<sub>2</sub>), 38.27 (1C, NH-CH<sub>2</sub>-CH<sub>2</sub>), 13.81 (1C, CH<sub>3</sub>). MS (ESI+) *m/z* (rel. int. %): 364 (M+Na+MeOH, 100), 310 (M+H, 26). (ESI-) *m/z* (rel. int. %): 308 (M-H, 100). Anal. calcd. for C<sub>11</sub>H<sub>11</sub>N<sub>5</sub>O<sub>6</sub> (309.24): C, 42.72; H, 3.59; N, 22.65. Found: C, 42.79; H, 3.64; N, 22.60%.

### 1.1.4 Synthesis of (4-(3-hydroxyphenyl)piperazin-1-yl)(5-nitrofuran-2-yl)methanone (**11**)

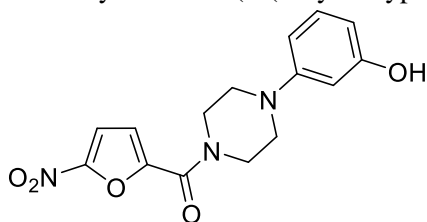

Compound **5** (0.384 g, 2.05 mmol, 1.2 eq.) was suspended in 25 ml dry DCM. Et<sub>3</sub>N (0.54 ml, 3.85 mmol, 2.3 eq.) was added and cooled to 5°C. Then acylchloride **1** (0.300 g, 1.71 mmol, 1.0 eq.) was added at once and stirred for 48 h at r.t. Reaction mixture was diluted with DCM and filtered through celite pad. The filtrate was washed with water, dried over anhydr. Na<sub>2</sub>SO<sub>4</sub> and evaporated. Crude product was purified by column chromatography – 1) DCM; 2) DCM:MTBE = 10:1 – for product. The solid product was washed with PE and dried *in vacuo* to give 0.135 g (25%) of pure **11** as pale yellow crystals. M.p. 179-180°C. <sup>1</sup>H NMR (600.18 MHz, DMSO-*d*<sub>6</sub>, 353 K): δ = 8.89 (s, 1H, OH), 7.69 (d, 1H, furane CH, *J* = 3.8 Hz), 7.26 (d, 1H, furane CH, *J* = 3.8 Hz), 7.01 (t, 1H, aromatic CH, *J* = 8.1 Hz), 6.41 (m, 1H, aromatic CH), 6.36 (t, 1H, aromatic CH, *J* = 2.3 Hz), 6.27 (m, 1H, aromatic CH), 3.81 (m, 4H, piperazine 2xCH<sub>2</sub>), 3.21 (m, 4H, piperazine 2xCH<sub>2</sub>). <sup>13</sup>C NMR (150.92 MHz, DMSO-*d*<sub>6</sub>, 353 K): δ = 157.85 (1C, C=O), 156.37 (1C, quaternary C<sub>arom.</sub>), 151.50 (1C, quaternary C<sub>arom.</sub>), 150.85 (1C, quaternary C<sub>arom.</sub>), 147.51 (1C, quaternary C<sub>arom.</sub>), 129.15 (1C, aromatic CH), 116.48 (1C, furane CH), 112.23 (1C, furane CH), 106.58 (1C, aromatic CH), 106.51 (1C, aromatic CH), 102.71 (1C, aromatic CH), 48.04 (2C, piperazine 2xCH<sub>2</sub>), 43.74 (br s, 2C, piperazine 2xCH<sub>2</sub>). MS (ESI+) *m/z* (rel. int. %): 318 (M+H, 16), 340 (M+Na, 98), 372 (M+Na+MeOH, 100). MS (ESI-) *m/z* (rel. int. %): 316 (M-H, 100), 362 (M+HCOO, 73), 633 (2M-H, 52). Anal. calcd. for C<sub>15</sub>H<sub>15</sub>N<sub>3</sub>O<sub>5</sub> (317.30): C, 56.78; H, 4.77; N, 13.24. Found: C, 56.83; H, 4.79; N, 13.20%.

### 1.1.5 Synthesis of (5-nitrofuran-2-yl)(4-(pyridin-2-yl)piperazin-1-yl)methanone (**12**)

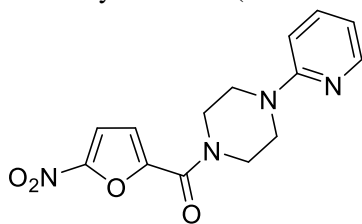

Compound **6** (0.334 g, 2.05 mmol, 1.15 eq.) was dissolved in 25 ml dry DCM. Et<sub>3</sub>N (0.54 ml, 3.85 mmol, 2.1 eq.) was added and cooled to 5°C. Then acylchloride **1** (0.317 g, 1.81 mmol, 1.0 eq.) was added at once and stirred for 18 h at r.t. Reaction mixture was washed with water, dried over anhydr. Na<sub>2</sub>SO<sub>4</sub> and evaporated. Crude product was purified by column chromatography – DCM:MTBE = 10:1. The solid product was washed with PE and dried *in vacuo* to give 0.411 g (75%) of pure **12** as yellow crystals. M.p. 149-150°C. <sup>1</sup>H NMR (600.18 MHz, DMSO-*d*<sub>6</sub>, 353 K): δ = 8.14 (m, 1H, aromatic CH), 7.70 (d, 1H, furane CH, *J* = 3.9 Hz), 7.56 (ddd, 1H, aromatic CH, *J* = 8.9, 7.1, 2.0 Hz), 7.27 (d, 1H, furane CH, *J* = 3.9 Hz), 6.83 (m, 1H, aromatic CH), 6.67 (dd, 1H, aromatic CH, *J* = 7.1, 4.9 Hz), 3.80 (m, 4H, piperazine 2xCH<sub>2</sub>), 3.64 (m, 4H, piperazine 2xCH<sub>2</sub>). <sup>13</sup>C NMR (150.92 MHz, DMSO-*d*<sub>6</sub>, 353 K): δ = 158.24 (1C, C=O), 156.51 (1C, quaternary C<sub>arom.</sub>), 150.85 (1C, quaternary C<sub>arom.</sub>), 147.51 (1C, quaternary C<sub>arom.</sub>), 147.18 (1C, aromatic CH), 137.13 (1C, aromatic CH), 116.49 (1C, aromatic CH), 112.92 (1C, aromatic CH), 112.22 (1C, aromatic CH), 106.84 (1C, aromatic CH), 44.14 (2C, piperazine 2xCH<sub>2</sub>), 43.70 (br s, 2C, piperazine 2xCH<sub>2</sub>). MS (ESI+) *m/z* (rel. int. %): 303 (M+H, 70), 357 (M+Na+MeOH, 100). MS (ESI-) *m/z* (rel. int. %): 285 (M-H-O, 100). Anal. calcd. for C<sub>14</sub>H<sub>14</sub>N<sub>4</sub>O<sub>4</sub> (302.29): C, 55.63; H, 4.67; N, 18.53. Found: C, 55.68; H, 4.61; N, 18.57%.

### 1.1.6 Synthesis of (5-nitrofuran-2-yl)(4-(4-nitrophenyl)piperazin-1-yl)methanone (**13**)

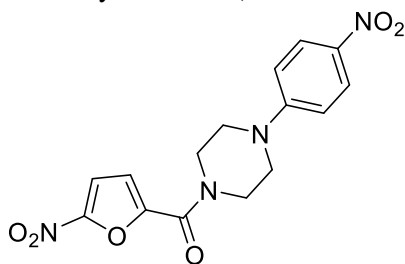

Compound **7** (0.425 g, 2.05 mmol, 1.15 eq.) was dissolved in 25 ml dry DCM. Et<sub>3</sub>N (0.36 ml, 2.56 mmol, 1.5 eq.) was added and cooled to 5°C. Then acylchloride **1** (0.300 g, 1.71 mmol, 1.0 eq.) was added at once and stirred for 18 h at r.t. Reaction mixture was washed with water, dried over anhydr. Na<sub>2</sub>SO<sub>4</sub> and evaporated. Crude product was purified by column chromatography – DCM:MTBE = 50:1. The solid product was washed with PE and dried *in vacuo* to give 0.540 g (91%) of pure **13** as bright orange crystals. M.p. 200-201°C. <sup>1</sup>H NMR (600.18 MHz, DMSO-*d*<sub>6</sub>, 353 K): δ = 8.08 (m, 2H, phenyl aromatic CH), 7.70 (d, 1H, furane CH, *J* = 3.9 Hz), 7.29 (d, 1H, furane CH, *J* = 3.9 Hz), 7.02 (m, 2H, phenyl aromatic CH), 3.88 (m, 4H, piperazine 2xCH<sub>2</sub>), 3.64 (m, 4H, piperazine 2xCH<sub>2</sub>). <sup>13</sup>C NMR (150.92 MHz, DMSO-*d*<sub>6</sub>, 353 K): δ = 156.53 (1C, C=O), 153.86 (1C, quaternary C<sub>arom.</sub>), 150.88 (1C, quaternary C<sub>arom.</sub>), 147.35 (1C, quaternary C<sub>arom.</sub>), 137.20 (1C, aromatic CH), 125.17 (2C, phenyl aromatic CH), 116.78 (1C, aromatic CH), 112.24 (3C, furane CH and 2 phenyl aromatic CH), 45.56 (2C, piperazine 2xCH<sub>2</sub>), 43.26 (br s, 2C, piperazine 2xCH<sub>2</sub>). MS (ESI+) *m/z* (rel. int. %): 369 (M+Na, 31), 385 (M+K, 28), 401 (M+Na+MeOH, 100). MS (ESI-) *m/z* (rel. int. %): 391 (M+HCOO, 100). Anal. calcd. for C<sub>15</sub>H<sub>14</sub>N<sub>4</sub>O<sub>6</sub> (346.30): C, 52.03; H, 4.08; N, 16.18. Found: C, 51.97; H, 4.10; N, 16.14%.

## **2. $^1\text{H}$ and $^{13}\text{C}$ NMR spectra of synthesized compounds**

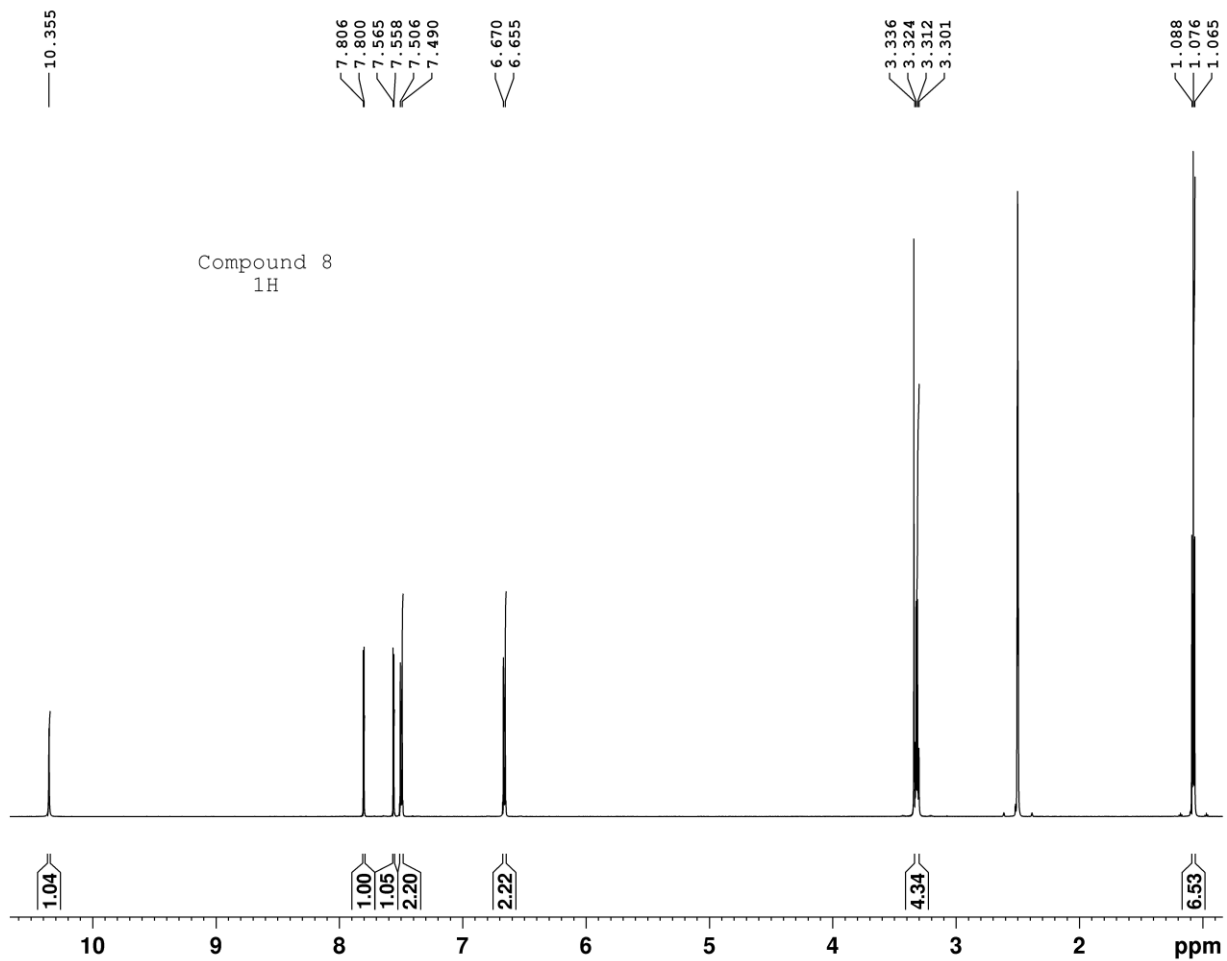

Current Data Parameters  
NAME: 50-123  
EXPNO: 1  
PROCNO: 1

F2 - Acquisition Parameters  
Date\_: 20200721  
Time: 2.14 h  
INSTRUM: spect  
PROBHD: E847801.047 (1  
PULPROG: zgpg  
TD: 32768  
SOLVENT: DMSO  
NS: 32  
DS: 0  
SWH: 9615.385 Hz  
F2RES: 0.58677 Hz  
AQ: 1.7039360 sec  
RG: 325  
DM: 32.000 usec  
DE: 14.37 usec  
TE: 300.0 K  
D1: 1.00000000 sec  
TDO: 1  
SFO1: 600.0145608 MHz  
HFO1: 148  
PC: 3.62 usec  
PL1: 10.80 usec  
PLW1: 20.00000000 W

F2 - Processing parameters  
SI: 65536  
SF: 600.0150048 MHz  
WDW: NO  
SSB: 0  
LB: 0 Hz  
GB: 0  
PC: 1.00

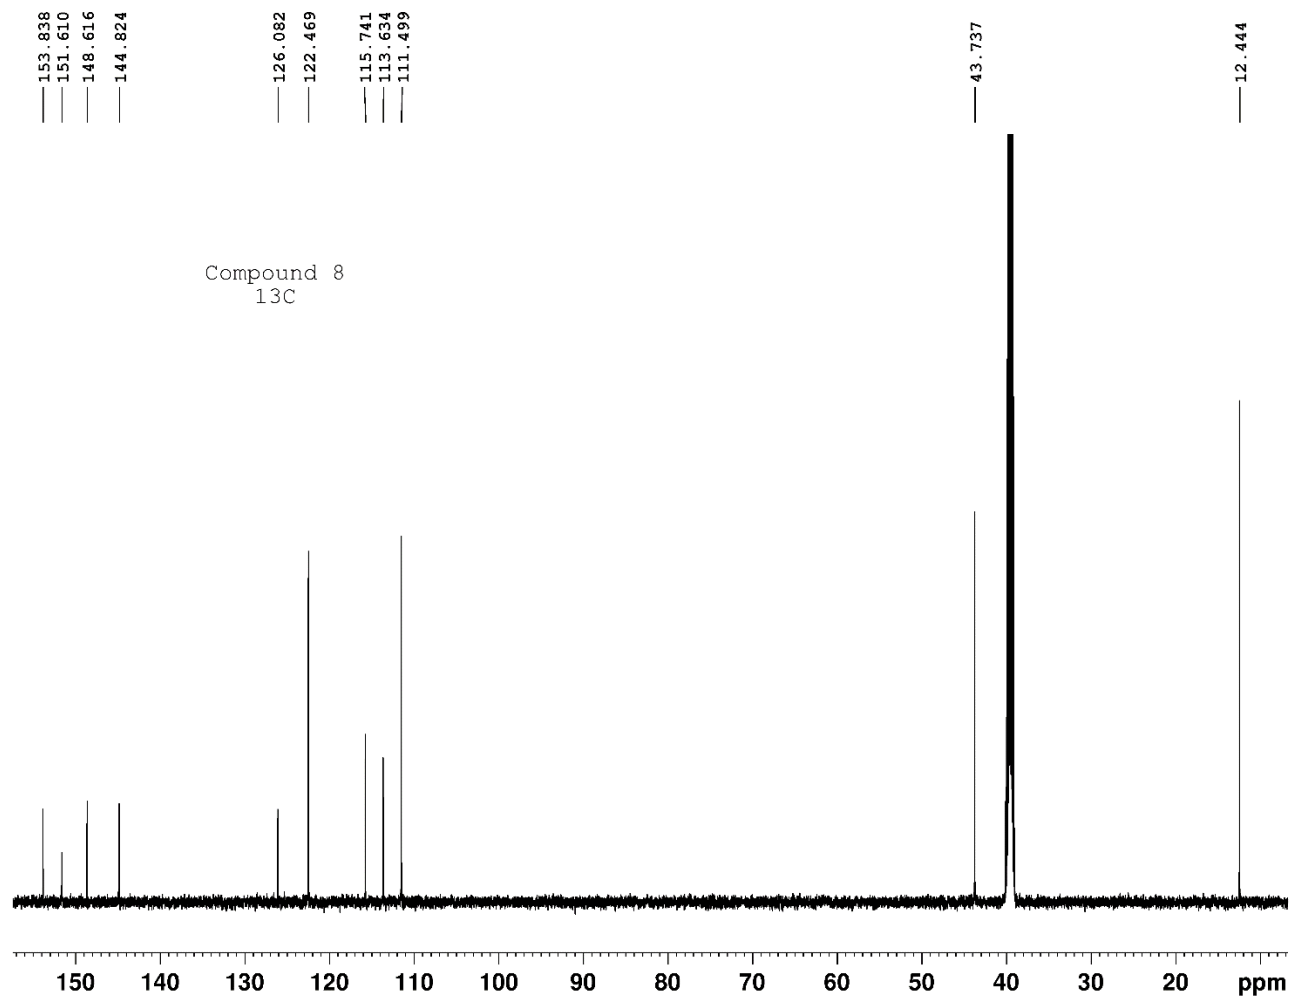

Current Data Parameters  
NAME DO-229  
EXPNO 16  
PROCNO 1

F2 - Acquisition Parameters  
Date\_ 20200721  
Time 9.31 h  
INSTRUM spect  
PROBHD zg47801.0047 (1  
PULPROG zgpg30  
TD 32768  
SOLVENT DMSO  
NS 1024  
DS 0  
SWH 36057.691 Hz  
FIDRES 2.200787 Hz  
AQ 0.4543529 sec  
RG 2050  
DW 13.967 usec  
DE 6.50 usec  
TE 293.0 K  
D1 1.50000000 sec  
D11 0.03000000 sec  
T20 1  
SFO1 150.8892338 MHz  
NUC1 13C  
P0 3.27 usec  
P1 9.80 usec  
PLM1 40.00000000 W  
SFO2 600.0124004 MHz  
NUC2 1H  
CPCPRG2 waltz16  
PCPD2 90.00 usec  
PLM2 20.00000000 W  
PLM12 0.33800000 W

F2 - Processing parameters  
SI 65536  
SF 150.8727015 MHz  
WDW EM  
SSB 0  
LB 1.00 Hz  
GB 0  
PC 0.50

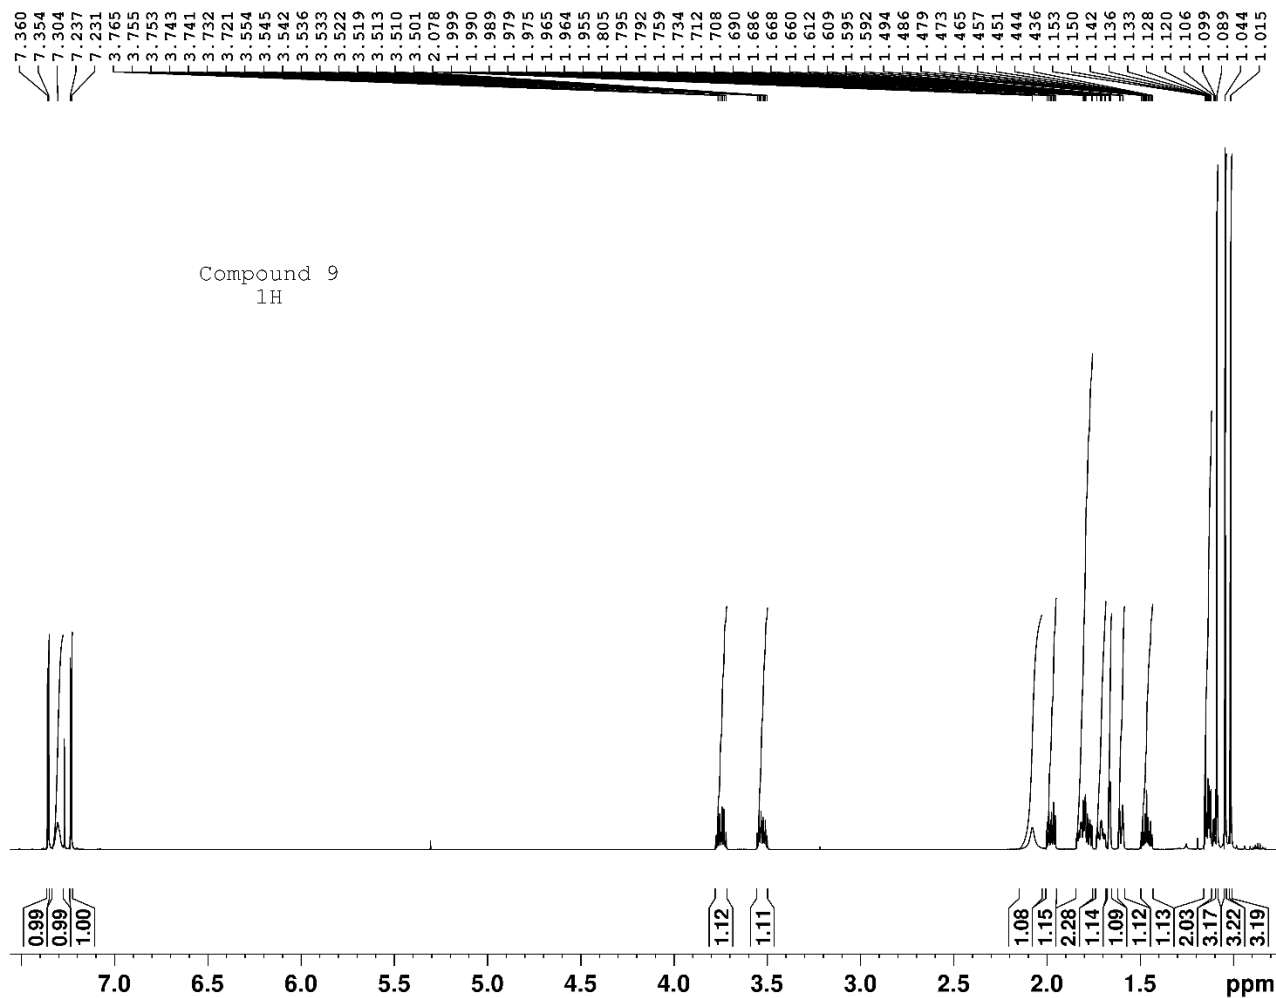

Current Data Parameters  
NAME DO-208  
EXPNO 1  
PROCNO 1

F2 - Acquisition Parameters  
Date\_ 20200417  
Time 0.11 h  
INSTRUM spect  
PROBHD 2847801\_0047 (1  
PULPROG zg30  
TD 32768  
SOLVENT CDCl3  
NS 32  
DS 0  
SWH 8615.382 Hz  
FIDRES 0.366877 Hz  
AQ 1.7039380 sec  
RG 144  
DF 52.000 usec  
DE 13.95 usec  
TE 293.0 K  
D1 1.00000000 sec  
TDO 1  
SFO1 600.0145608 MHz  
NUC1 1H  
P1 10.85 usec  
PL1 20.00000000 W

F2 - Processing parameters  
SI 65536  
SF 600.0100088 MHz  
WDW EM  
SSB 0  
LB 0 Hz  
GB 0  
PC 1.00

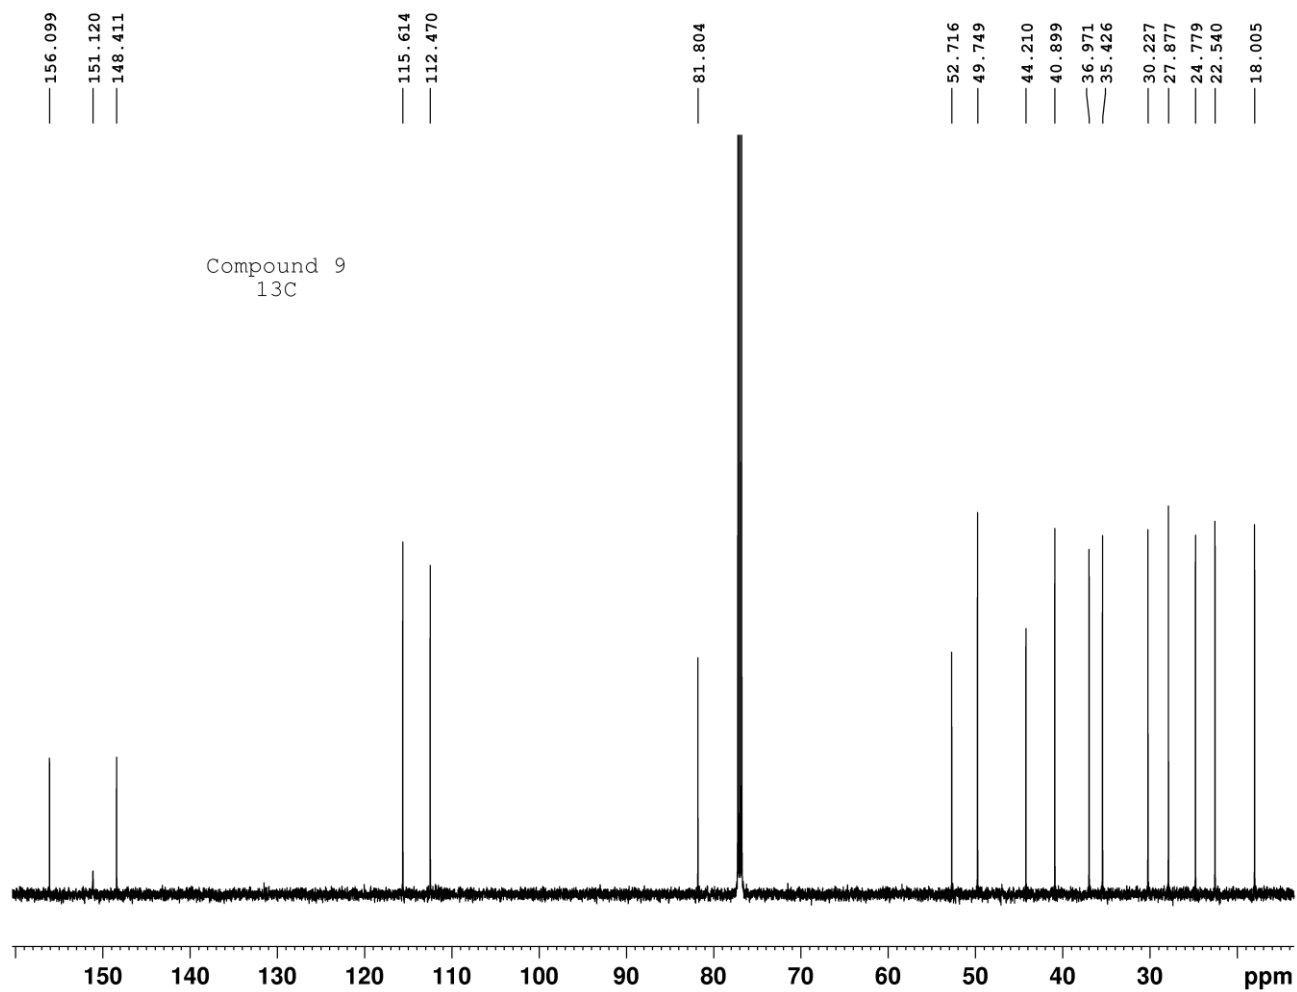

Current Data Parameters  
NAME DO-208  
EXPNO 16  
PROCNO 1

F2 - Acquisition Parameters  
Date\_ 20200417  
Time 1.00 h  
INSTRUM spect  
PROBHD 2847801\_0047 (7  
PULPROG zgpg30  
TD 32768  
SOLVENT CDCl3  
NS 512  
DS 0  
SWH 36057.691 Hz  
FIDRES 2.200787 Hz  
AQ 0.4543829 sec  
RG 2050  
DW 13.867 usec  
DE 6.50 usec  
TE 293.0 K  
D1 1.50000000 sec  
D11 0.03000000 sec  
TD0 1  
SFO1 150.8892338 MHz  
NUC1 13C  
P1 9.80 usec  
PLW1 40.00000000 W  
SFO2 600.0124004 MHz  
NUC2 1H  
CPDPRG2 waltz16  
PCPD2 90.00 usec  
PLW2 20.00000000 W  
PLW12 0.33800000 W

F2 - Processing parameters  
SI 65536  
SF 150.8726422 MHz  
WDW EM  
SSB 0  
LB 1.00 Hz  
GB 0  
PC 1.40

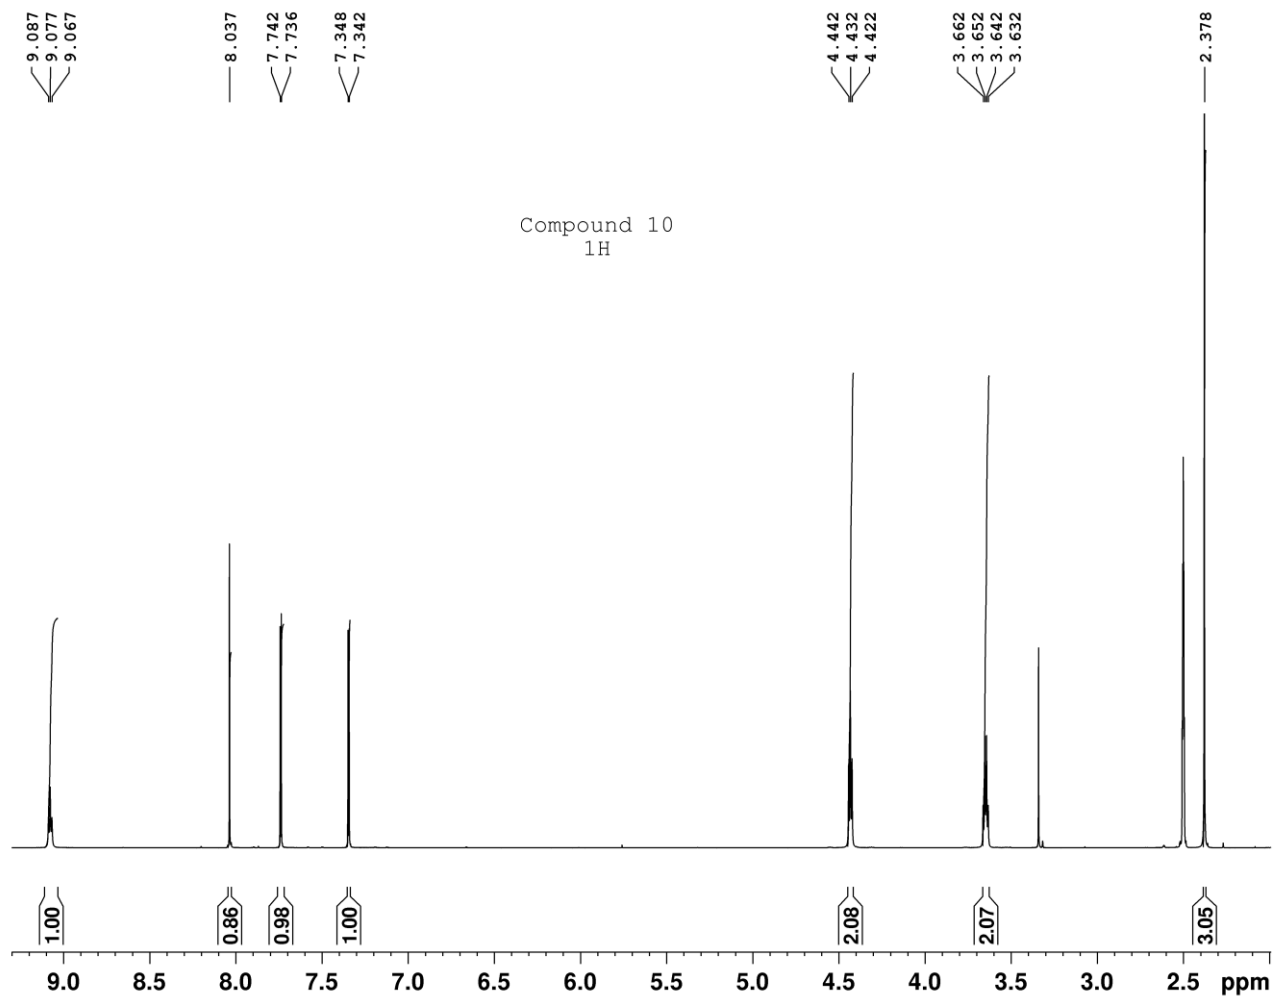

Current Data Parameters  
NAME DO-142A  
EXPNO 11  
PROCNO 1

F2 - Acquisition Parameters  
Date\_ 20200312  
Time 4.08 h  
INSTRUM spect  
PROBHD zg30  
PULPROG zg30  
TD 32768  
SOLVENT DMSO  
NS 32  
DS 0  
SWH 9615.385 Hz  
FIDRES 0.586877 Hz  
AQ 1.7039360 sec  
RG 228  
DW 52.000 usec  
DE 13.95 usec  
TE 293.0 K  
D1 1.00000000 sec  
TDO 1  
SFO1 600.0145608 MHz  
NUC1 1H  
P1 10.85 usec  
PLW1 20.00000000 W

F2 - Processing parameters  
SI 65536  
SF 600.0100048 MHz  
WDW EM  
SSB 0  
LB 0 Hz  
GB 0  
PC 1.00

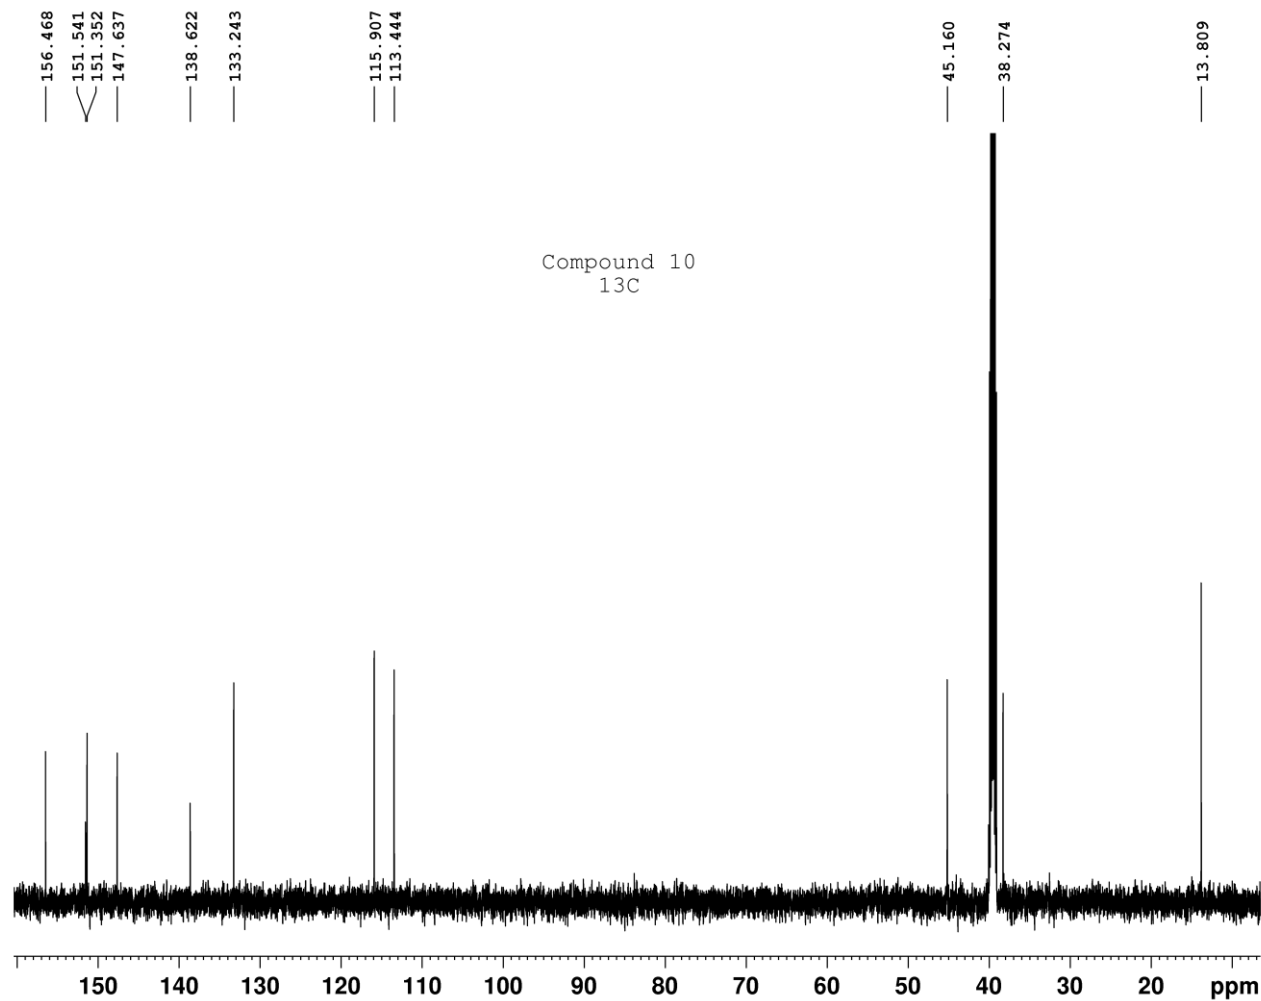

```

Current Data Parameters
NAME      DO-142A
EXPNO     16
PROCNO    1

F2 - Acquisition Parameters
Data      20200312
Time      4.44 h
INSTRUM   spect
PROBHD    Z847801_0047 (
PULPROG   zgpg30
TD         32768
SOLVENT    DMSO
NS         128
DS         2
SWE        36057.691 Hz
FIDRES     2.300787 Hz
AQ         0.4561820 sec
RG          2050
DW         13.947 usec
DE         6.50 usec
TE         295.1 K
D1         1.50000000 sec
D11        0.03000000 sec
TDO
SF01       150.8892338 MHz
NUC1        13C
P1         9.80 usec
PL1        40.00000000 W
SF02       600.0124004 MHz
NUC2        1H
CPDPRG2    veltz16
PCPD2      90.00 usec
PLM2       20.00000000 W
PLM12      0.33800000 W

F2 - Processing parameters
SI          65536
SF          150.8727015 MHz
RG          64
SSB         0
LB          1.00 Hz
GB          0
PC          1.40

```

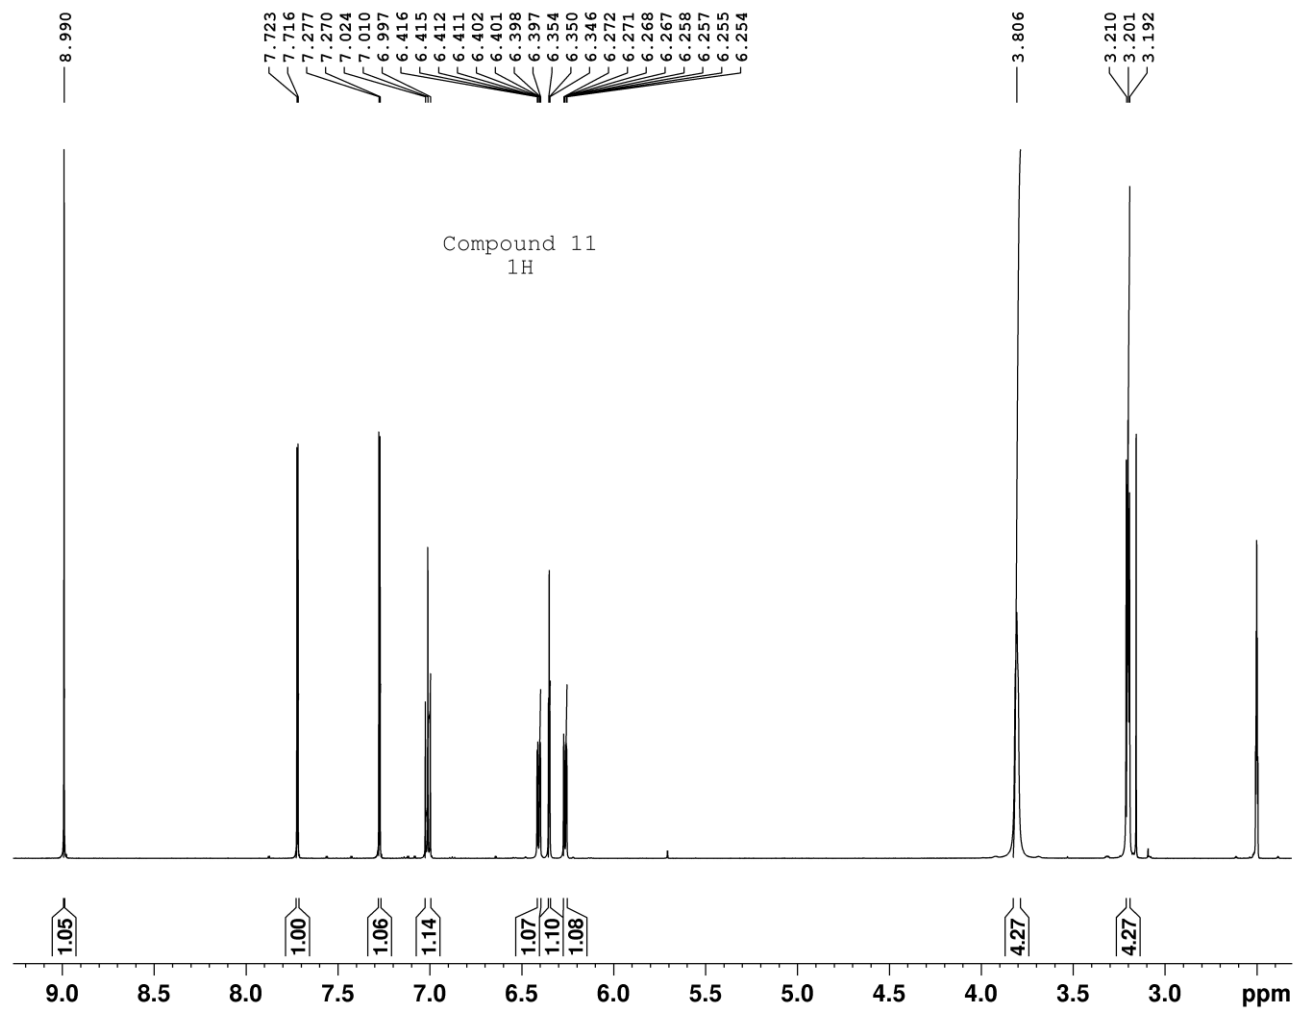

Current Data Parameters  
NAME 00-1468  
EXPNO 21  
PROCNO 1

F2 - Acquisition Parameters  
Date\_ 20210903  
Time 14.05 h  
INSTRUM spect  
PROBHD zgpg30  
PULPROG zgpg30  
TD 32768  
SOLVENT DMSO  
NS 32  
DS 8  
SWH 9615.385 Hz  
FIDRES 0.586877 Hz  
AQ 1.7039365 sec  
RG 228  
SW 52.000 usec  
DE 14.37 usec  
TE 322.2 K  
D1 1.00000000 sec  
TDS 3  
SFO1 600.0145608 MHz  
NUC1 13  
P2 3.62 usec  
F1 10.80 usec  
PLM1 20.00000000 W

F2 - Processing parameters  
SI 65536  
SF 600.0100448 MHz  
WDW EM  
SSB 0 Hz  
LB 0 Hz  
GB 0  
PC 1.00

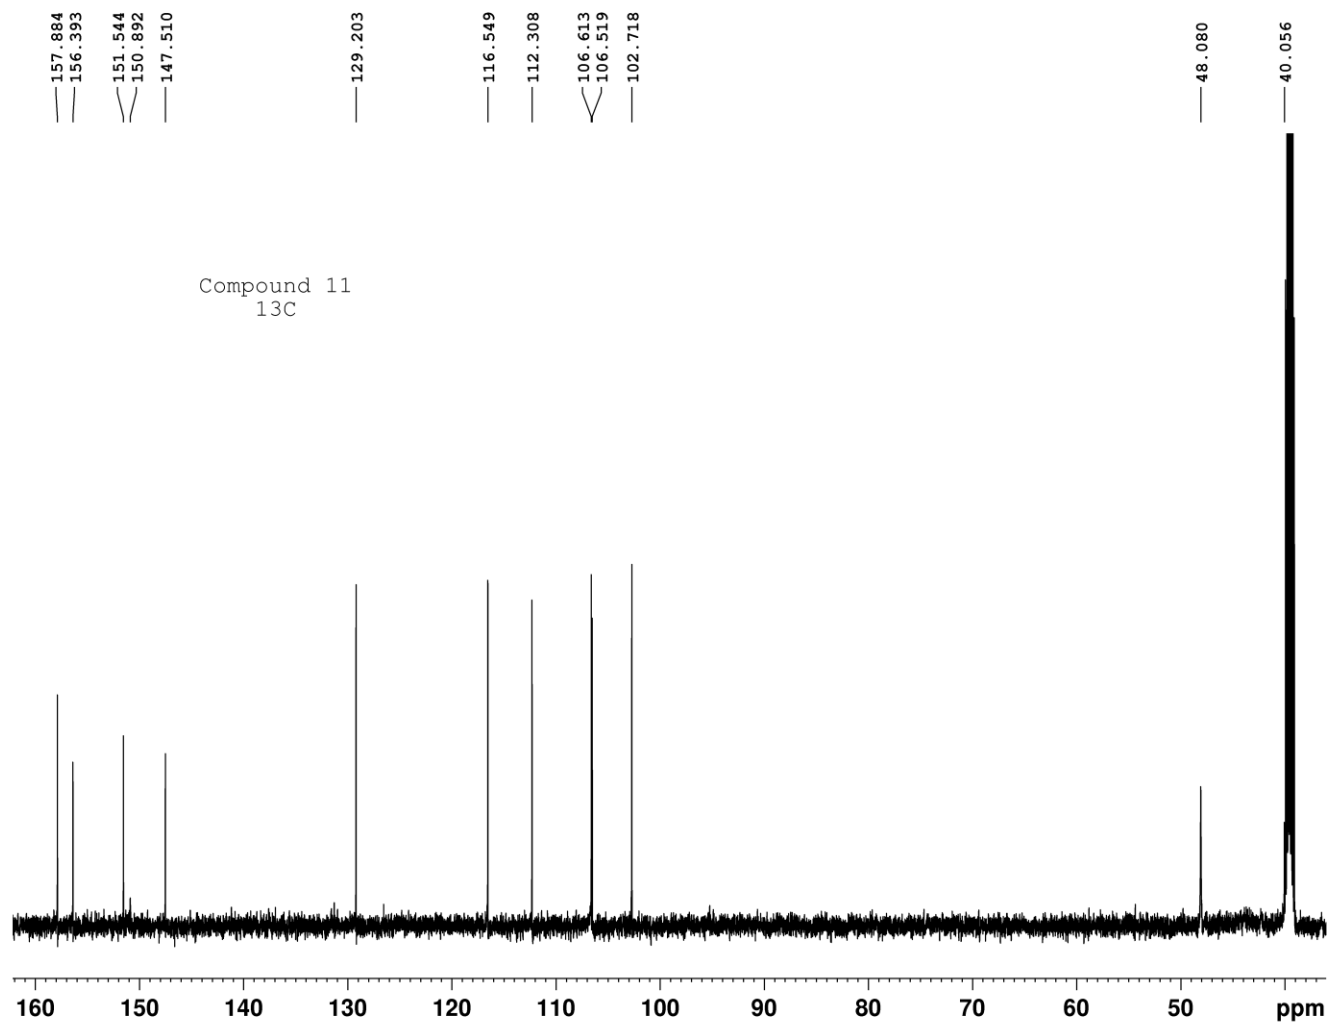

Current Data Parameters  
NAME 20P-C-27-2A  
EXPNO 22  
PROCNO 1

F2 - Acquisition Parameters  
Date\_ 20070814  
Time 20:43:54  
INSTRUM spect  
PROBHD spect-1047 (1  
PULPROG zgpg30  
TD 65536  
SOLVENT H2O  
DS 4  
SWH 36007.430 Hz  
FIDRES 2.336759 Hz  
AQ 0.4542029 sec  
RG 320  
SR 17.581 MHz  
SE 61.80 uV  
TE 300.2 K  
SI 1.50000000 sec  
SFO 100.6261199 MHz  
NUC1 13C  
NUC2 1H  
PC 3.21 sec  
PFL 60.0000000 Hz  
SFO1 500.1364000 MHz  
SFO2 100.6261199 MHz  
CHRG1(1) neutral  
CHRG2 20.0000000 e  
PARK1 0.53064999 Hz  
PARK2 0.53064999 Hz

F2 - Processing parameters  
SI 32768  
SF 100.6261199 MHz  
WDW EM  
SSB 0  
LB 1.00 Hz  
GB 0  
PC 1.40

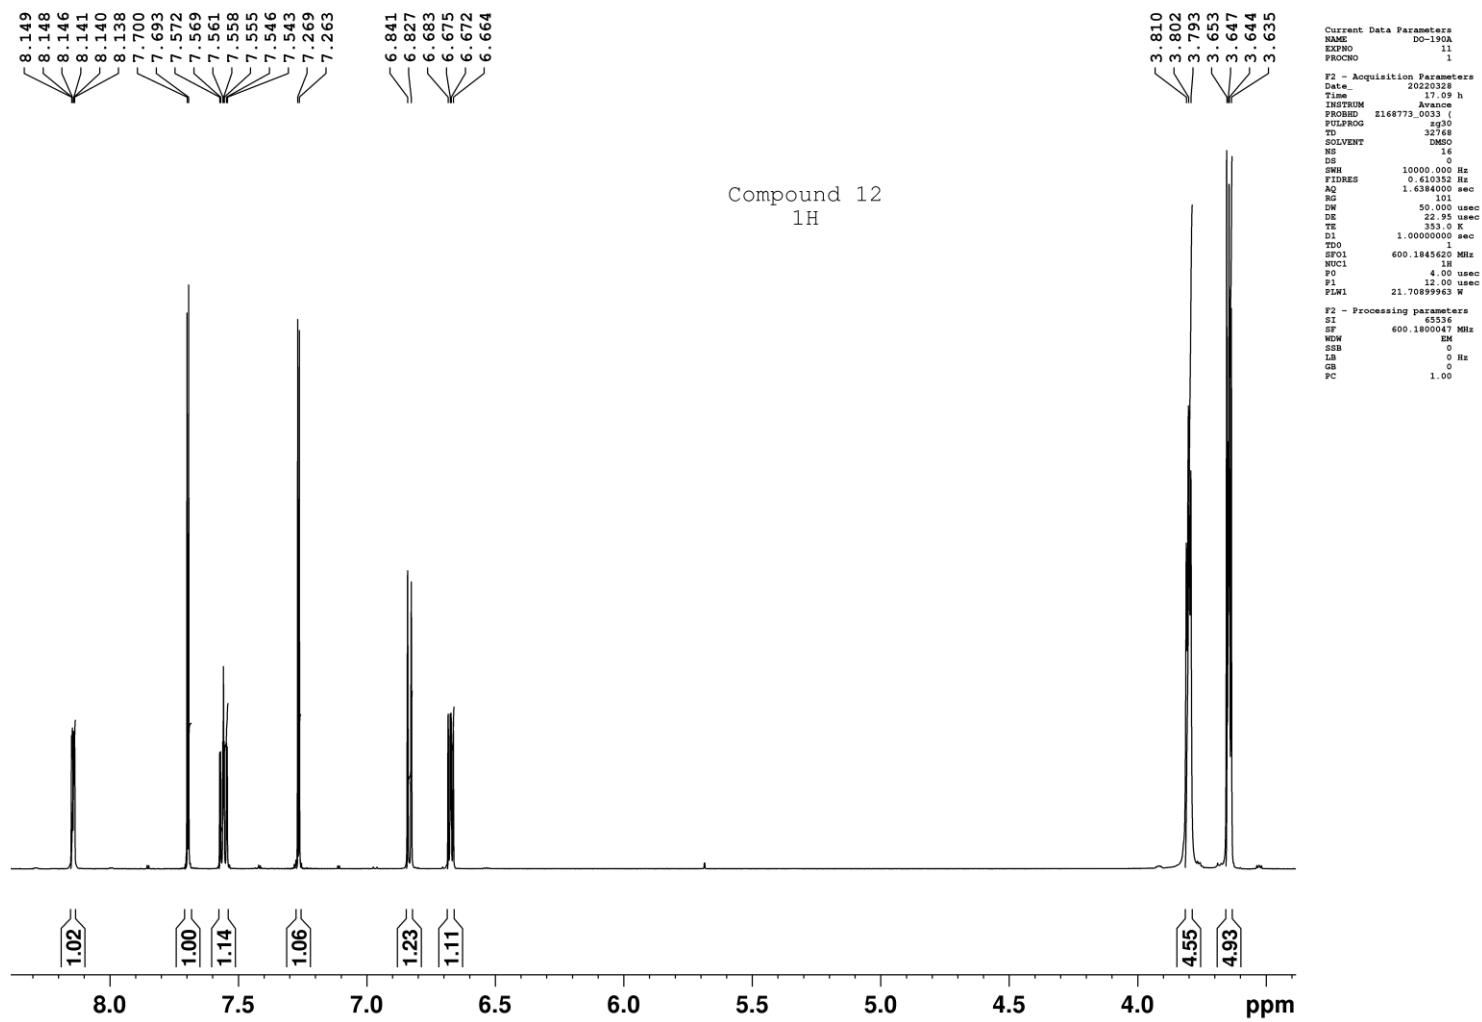

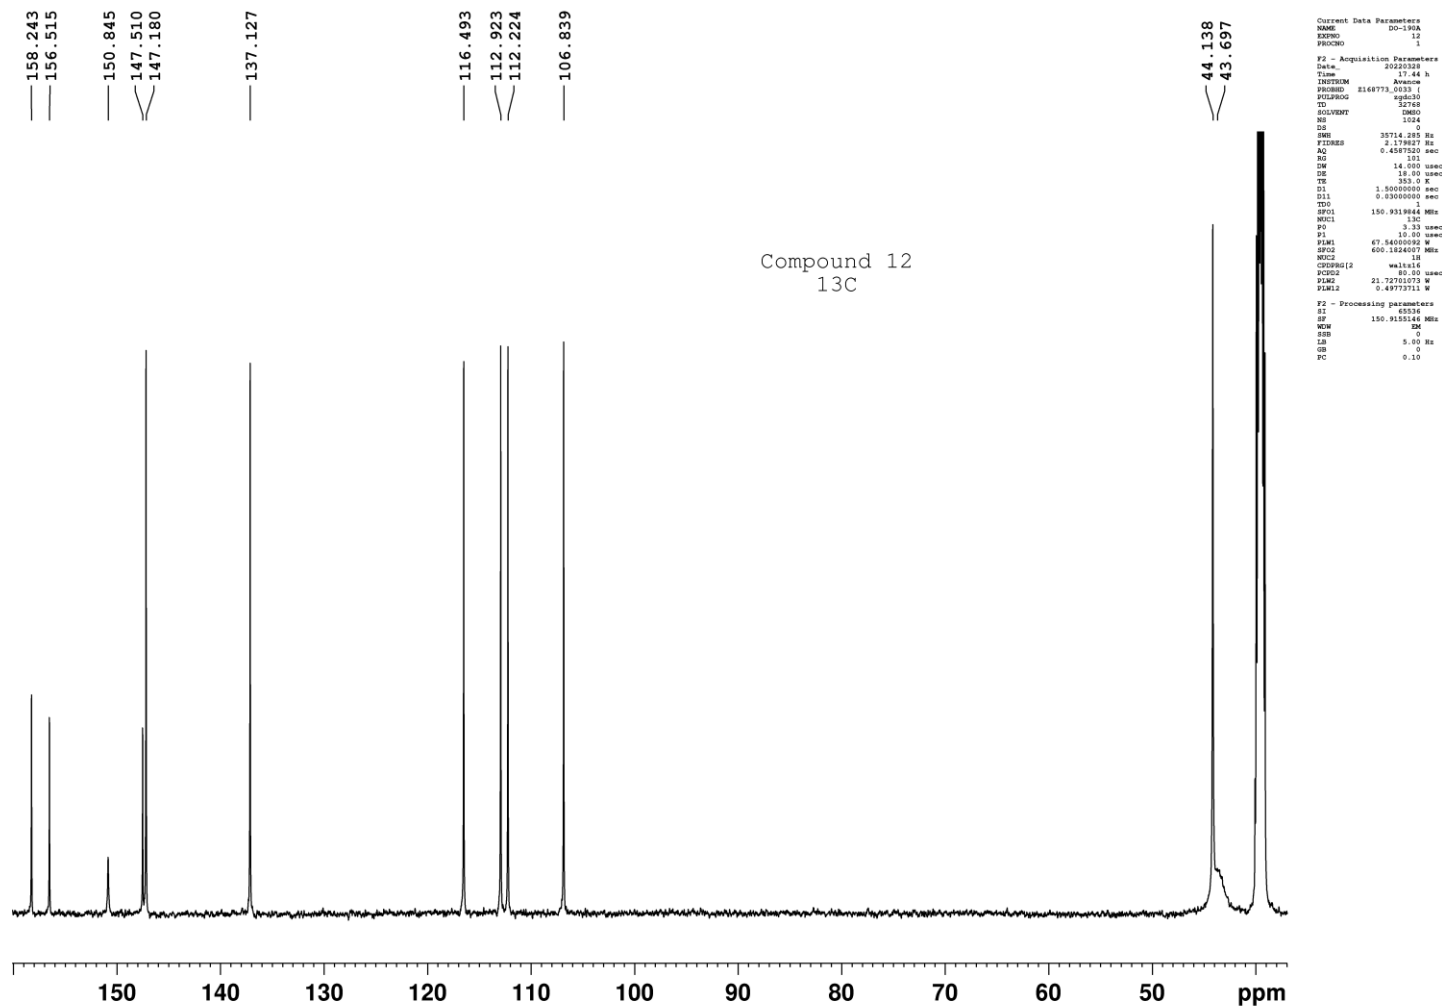

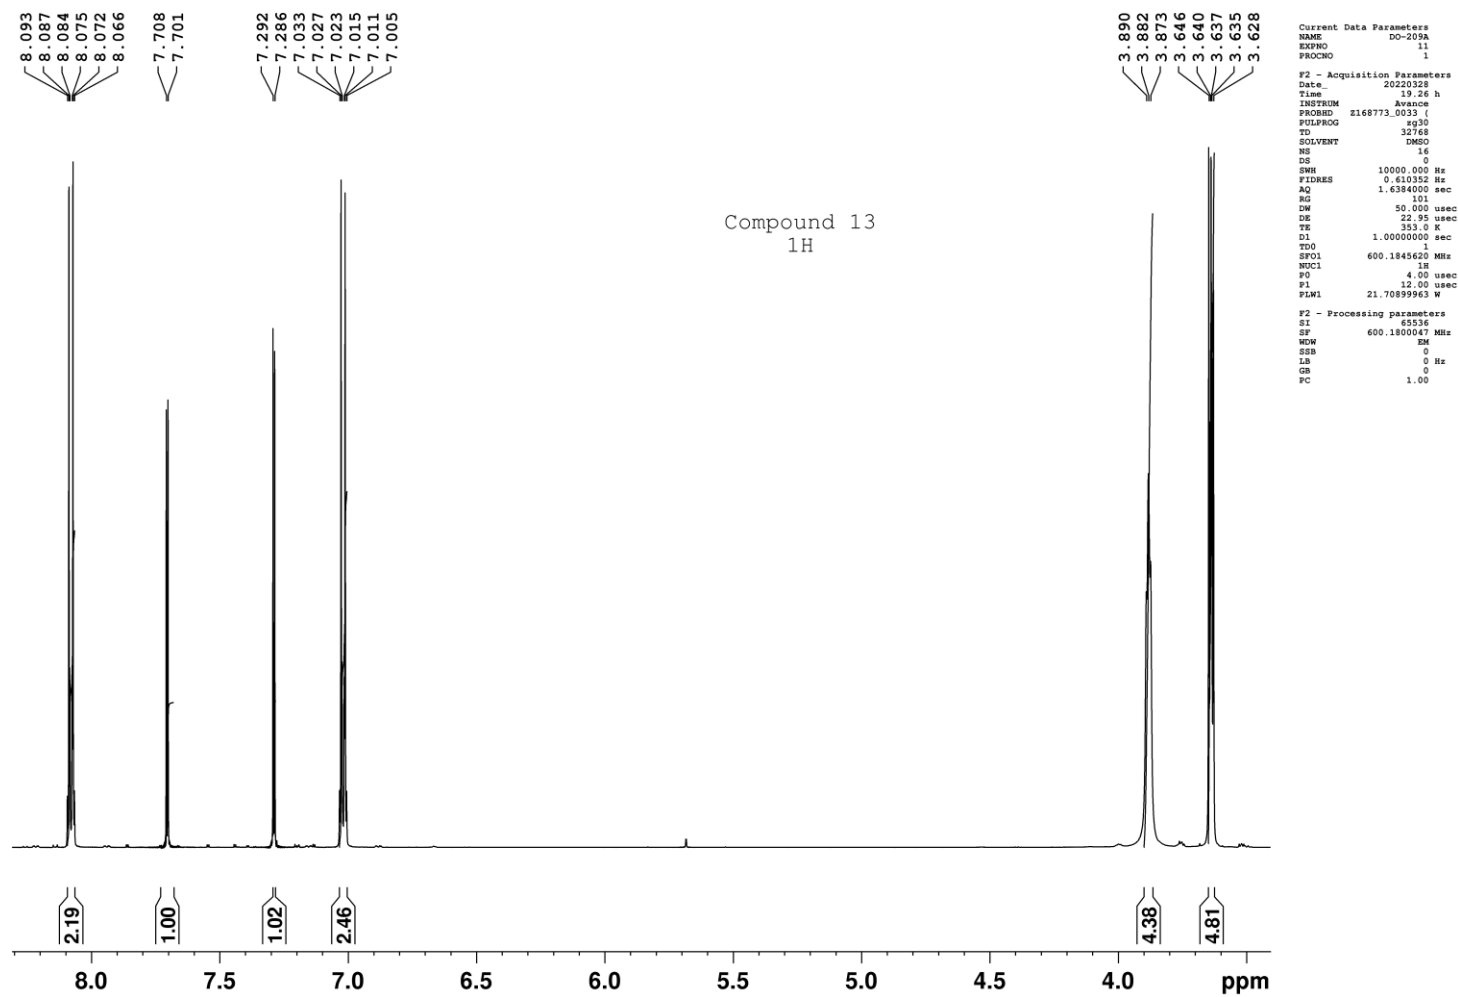

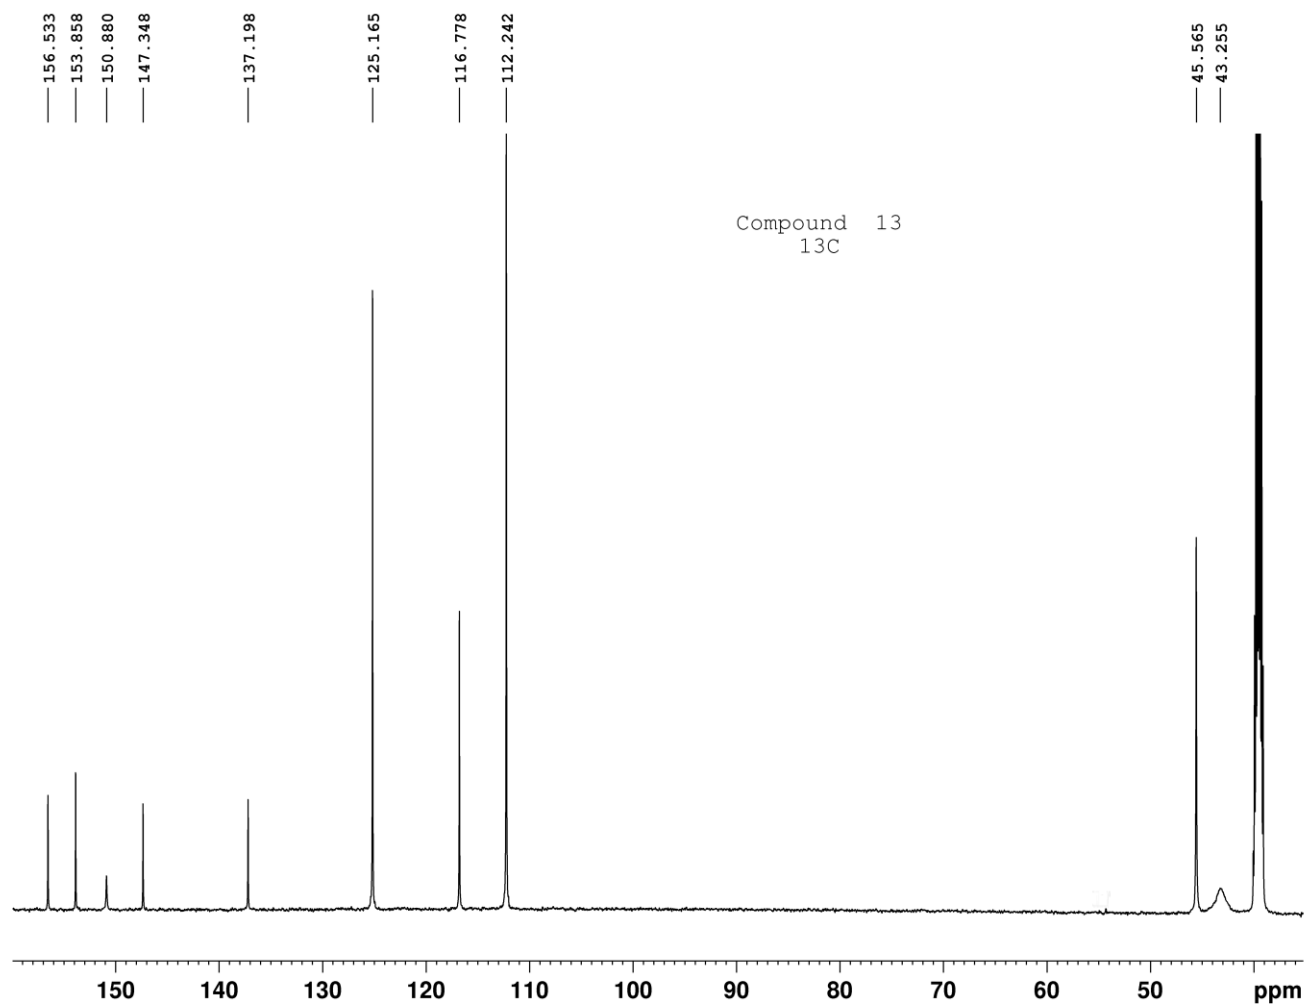

Current Data Parameters  
NAME DO-209A  
EXPNO 12  
PROCNO 1  
F2 - Acquisition Parameters  
Date\_ 20220328  
Time 20:01 h  
INSTRUM Avance  
PROBHD 5168773\_0033 1  
PULPROG zgpg30  
TD 32768  
SOLVENT DMSO  
NS 1624  
DS 0  
SWH 35714.885 Hz  
FIDRES 2.178827 Hz  
AQ 0.4587520 sec  
RG 101  
RW 14.800 used  
DE 18.00 used  
TE 303.2 K  
D1 1.50000000 sec  
d11 0.03000000 sec  
TDS 1  
SFO1 150.9319444 MHz  
NUC1 13C  
PC 1.33 used  
P1 10.00 used  
PR1 67.56000092 W  
SFO2 600.1824007 MHz  
NUC2 1H  
CPCPG22 waltz16  
PCPD 80.00 used  
PR2 21.72701073 W  
PR12 0.49773711 W  
F2 - Processing parameters  
SI 65536  
SF 150.9155143 MHz  
WDW RM  
SSB 0  
LB 5.00 Hz  
GB 0  
PC 1.40

### **3. MS spectra of synthesized compounds**

# ==== Shimadzu LabSolutions Browser Report ====

Ret. Time: 1-1(E+) 1-2(E-) [0.193->0.633]-[0.073->0.960]

MS Spectrum(DO-229.lcd)

Compound 8

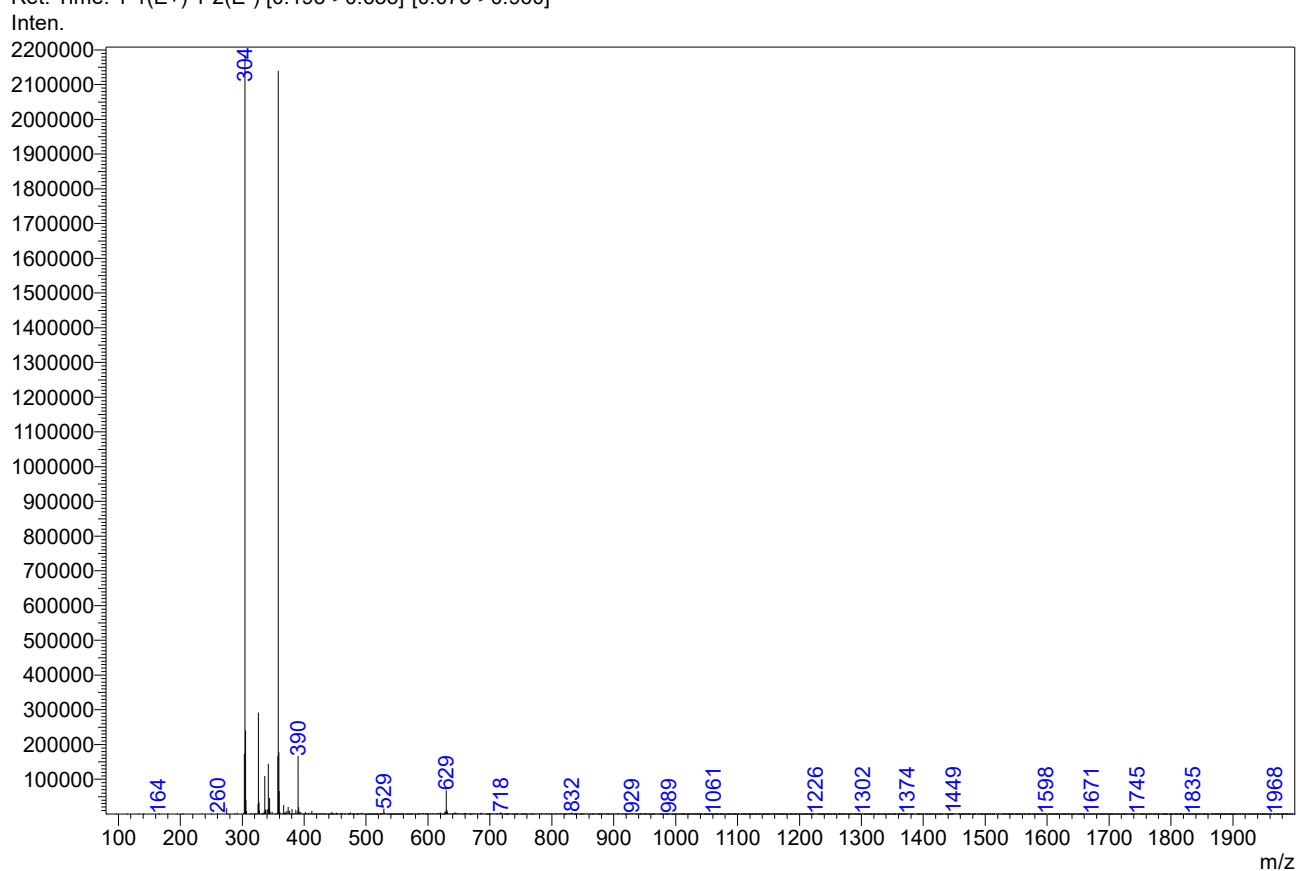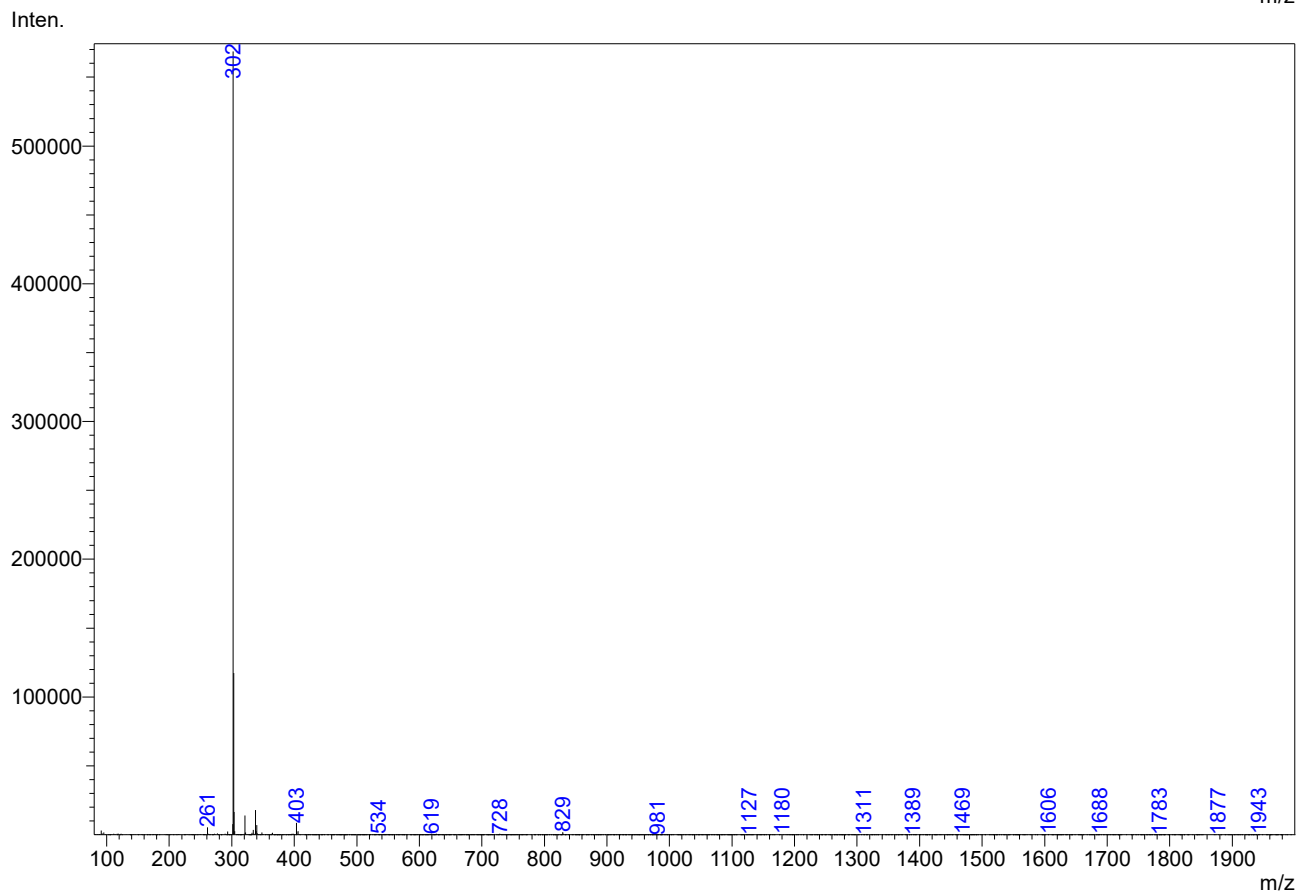

# ==== Shimadzu LabSolutions Browser Report ====

Ret. Time: 1-1(E+) 1-2(E-) [0.193->0.720]-[0.120->1.013]

MS Spectrum(DO-208.lcd)

Compound 9

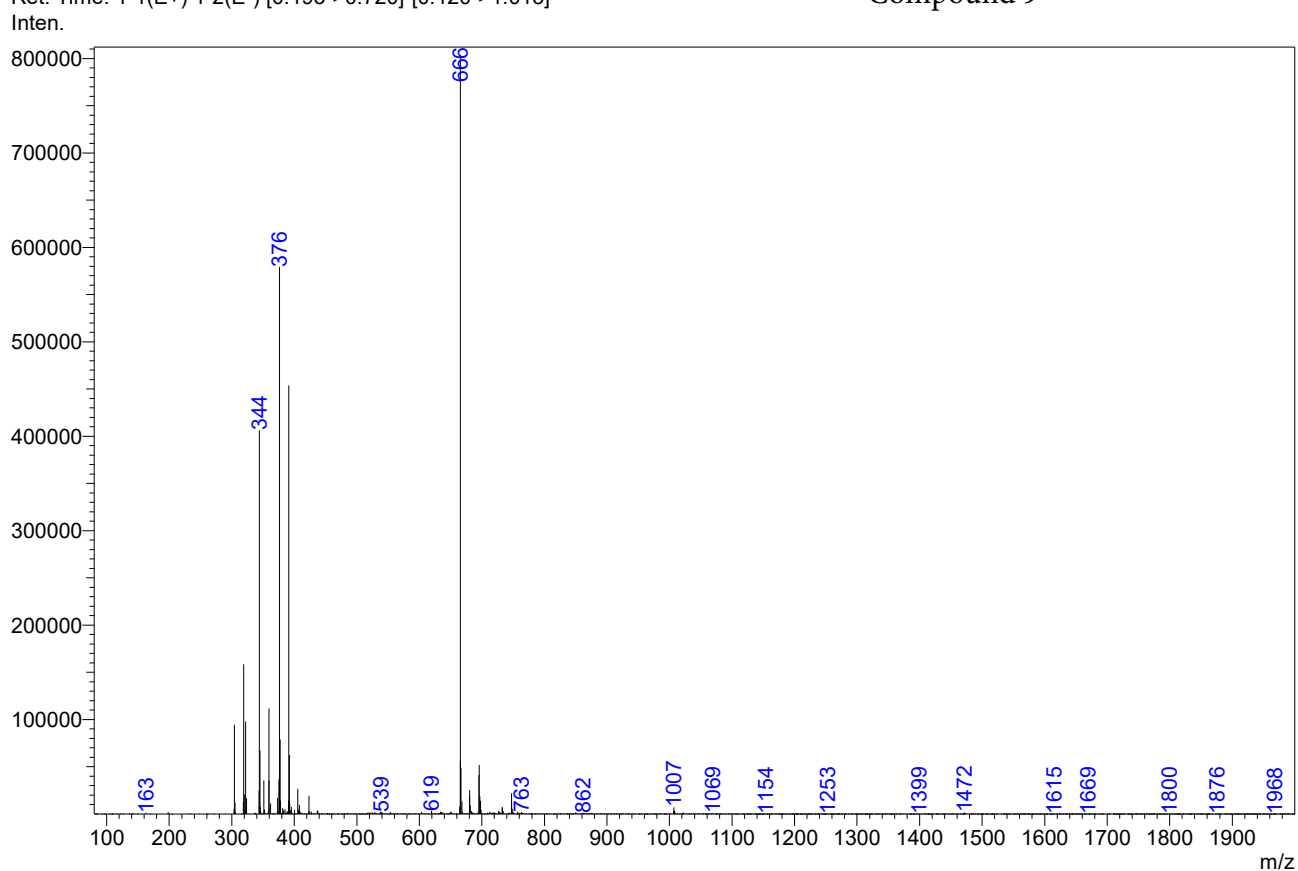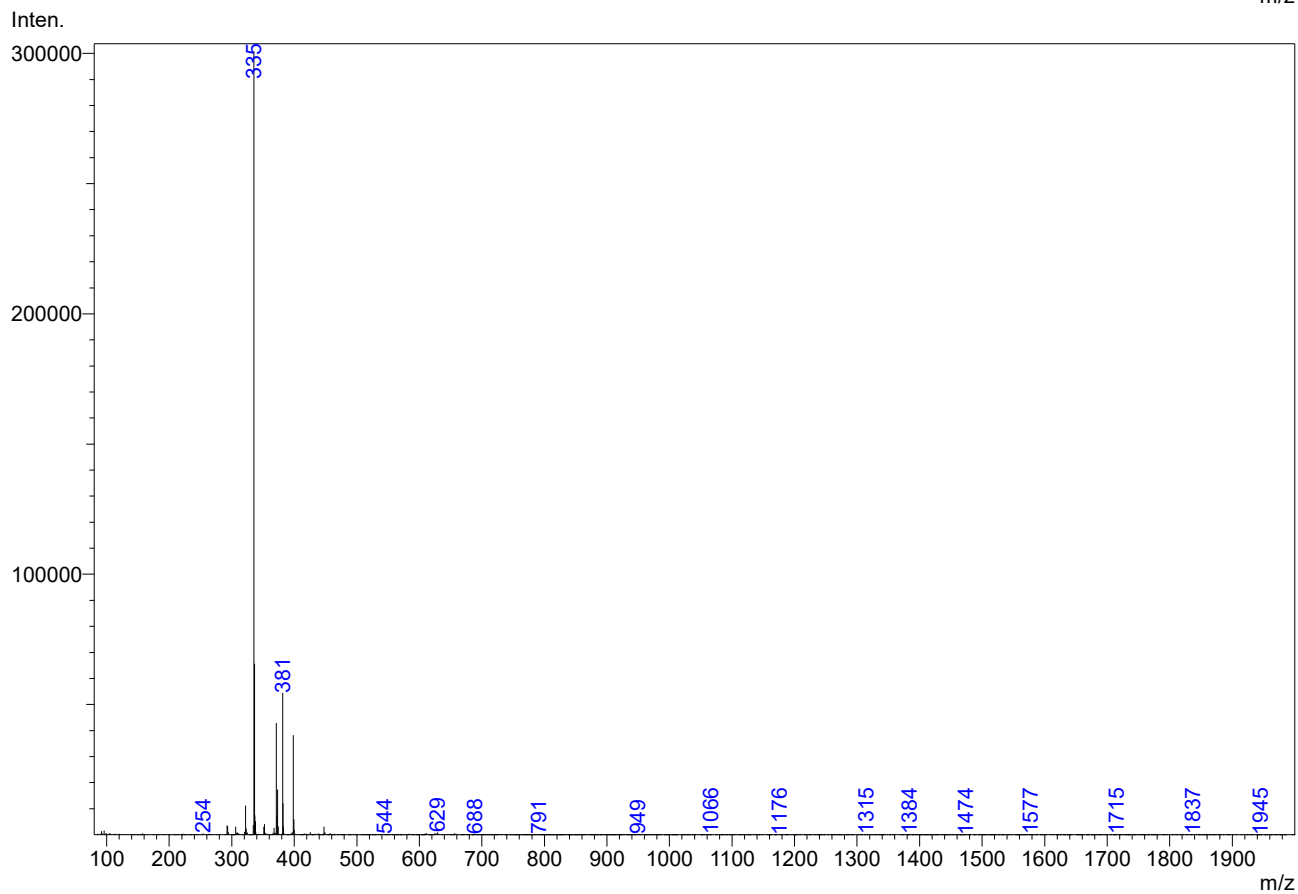

# ==== Shimadzu LabSolutions Browser Report ====

Ret. Time: 1-1(E+) 1-2(E-) [0.347]

MS Spectrum(DO-142.lcd) Compound 10

Inten.

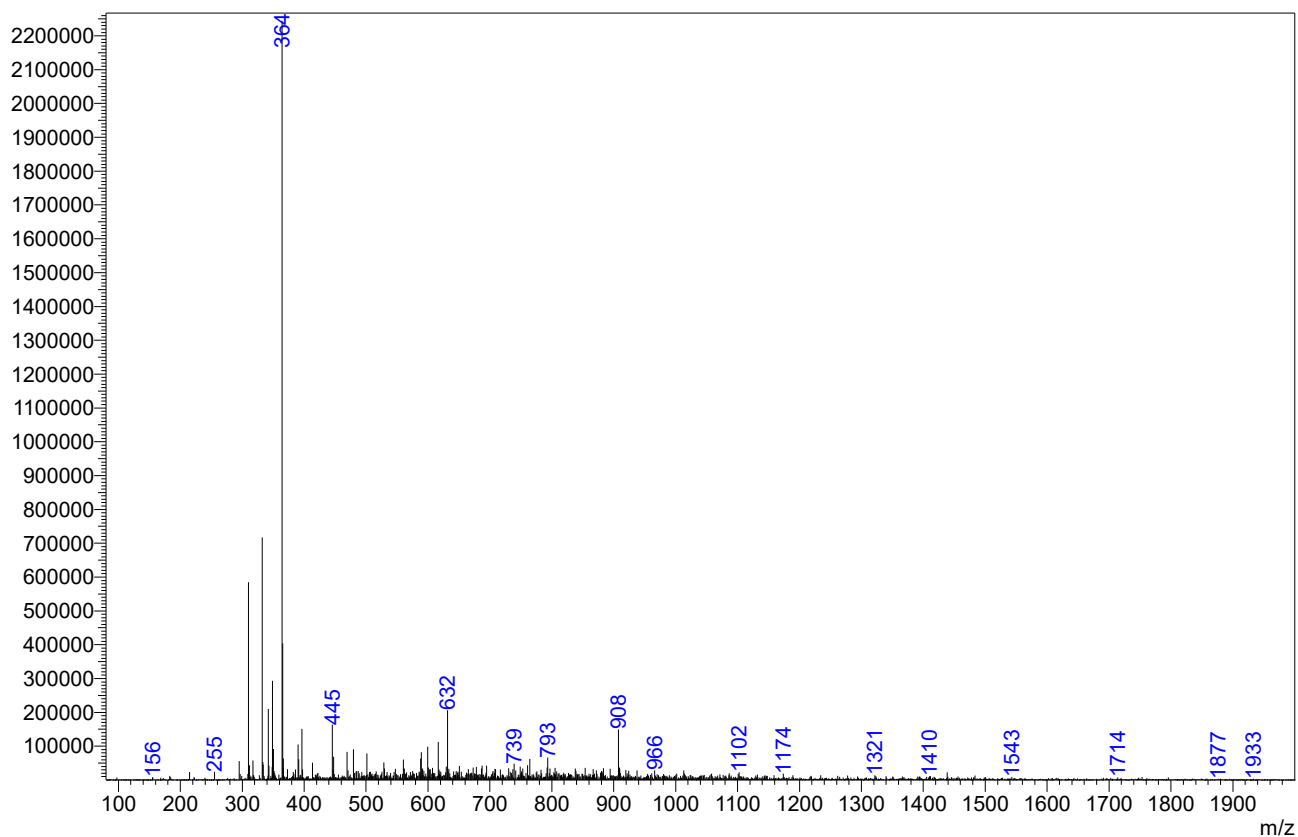

Inten.

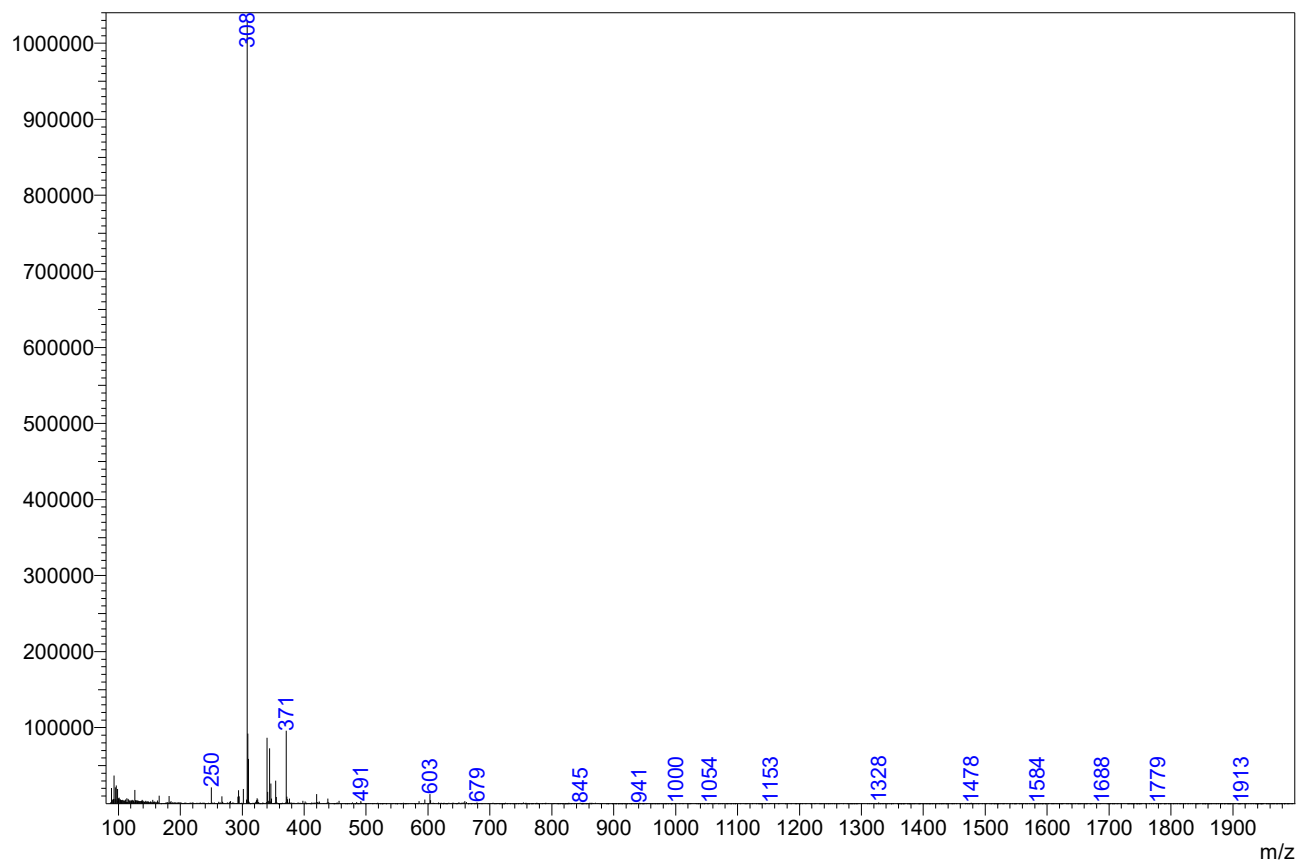

# ==== Shimadzu LabSolutions Browser Report ====

Ret. Time: 1-1(E+) 1-2(E-) [0.207->0.567]-[0.113->1.053]  
Inten.

MS Spectrum(DO-166.lcd)

Compound 11

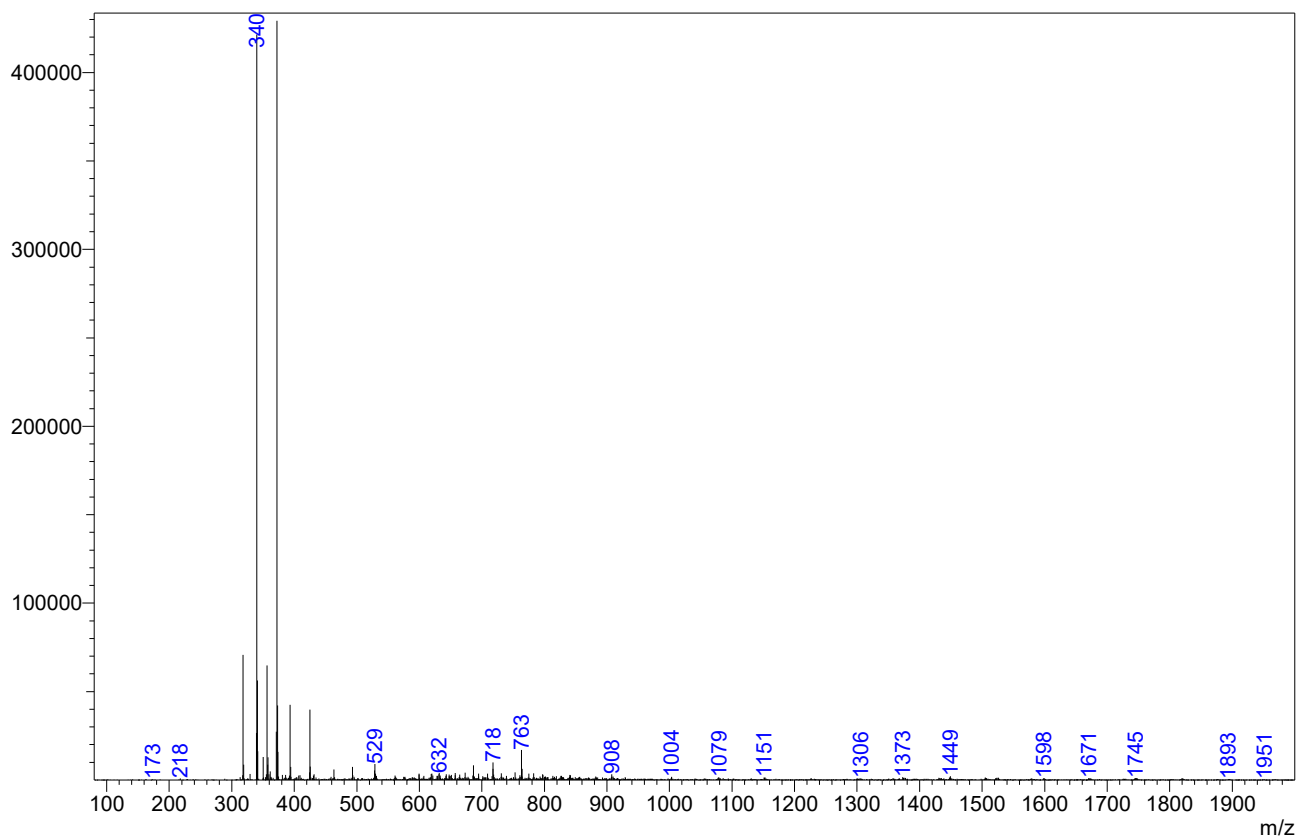

Inten.

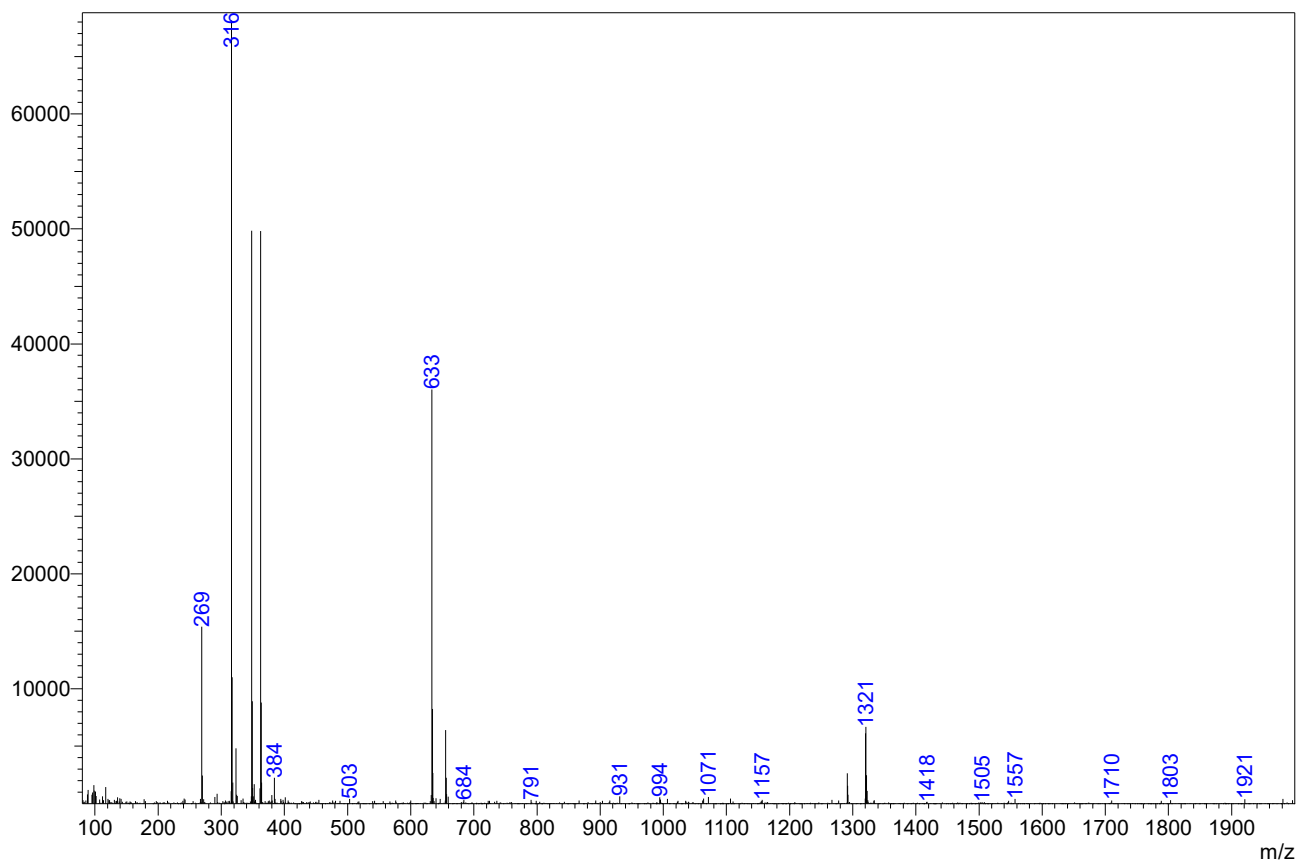

# ==== Shimadzu LabSolutions Browser Report ====

Ret. Time: 1-1(E+) 1-2(E-) [0.200->0.700]-[0.107->1.273]  
Inten.

MS Spectrum(DO-190.lcd)

Compound 12

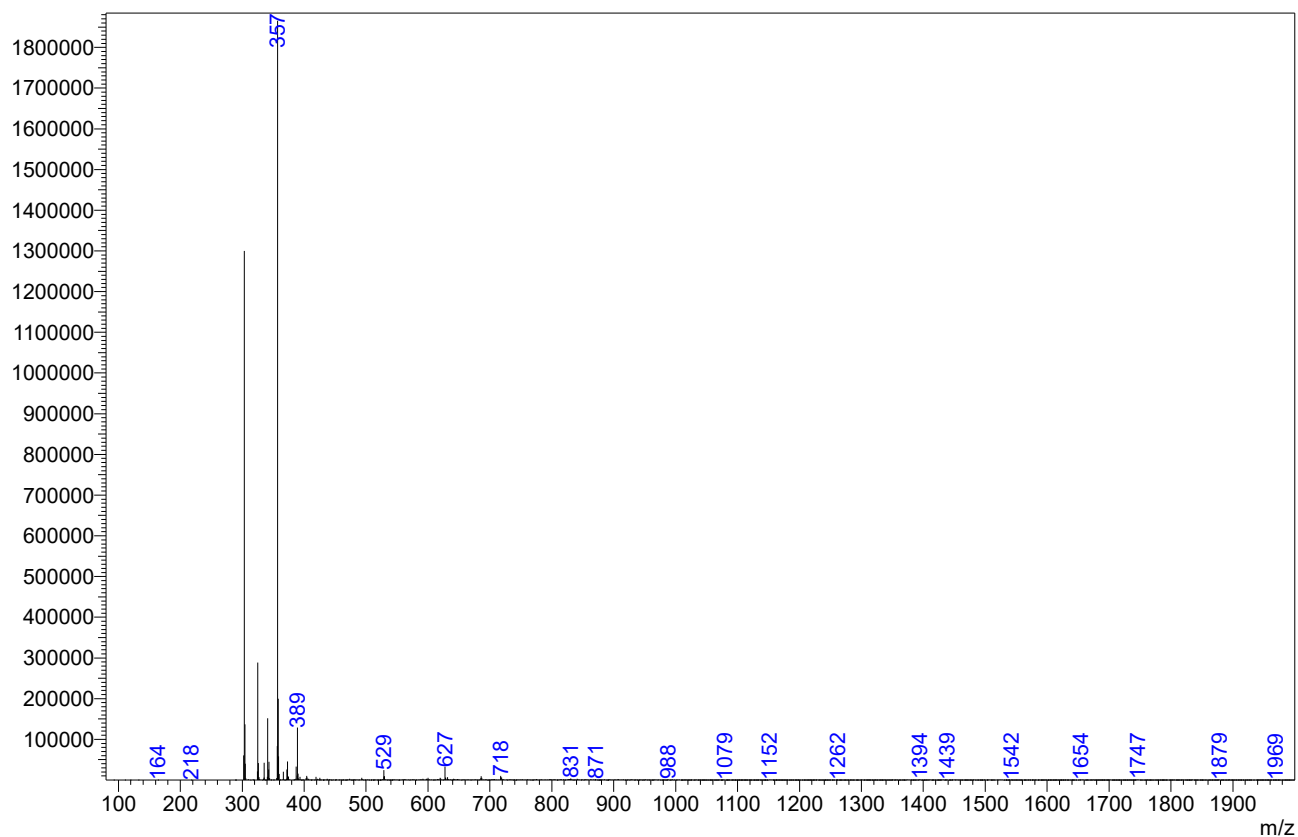

Inten.

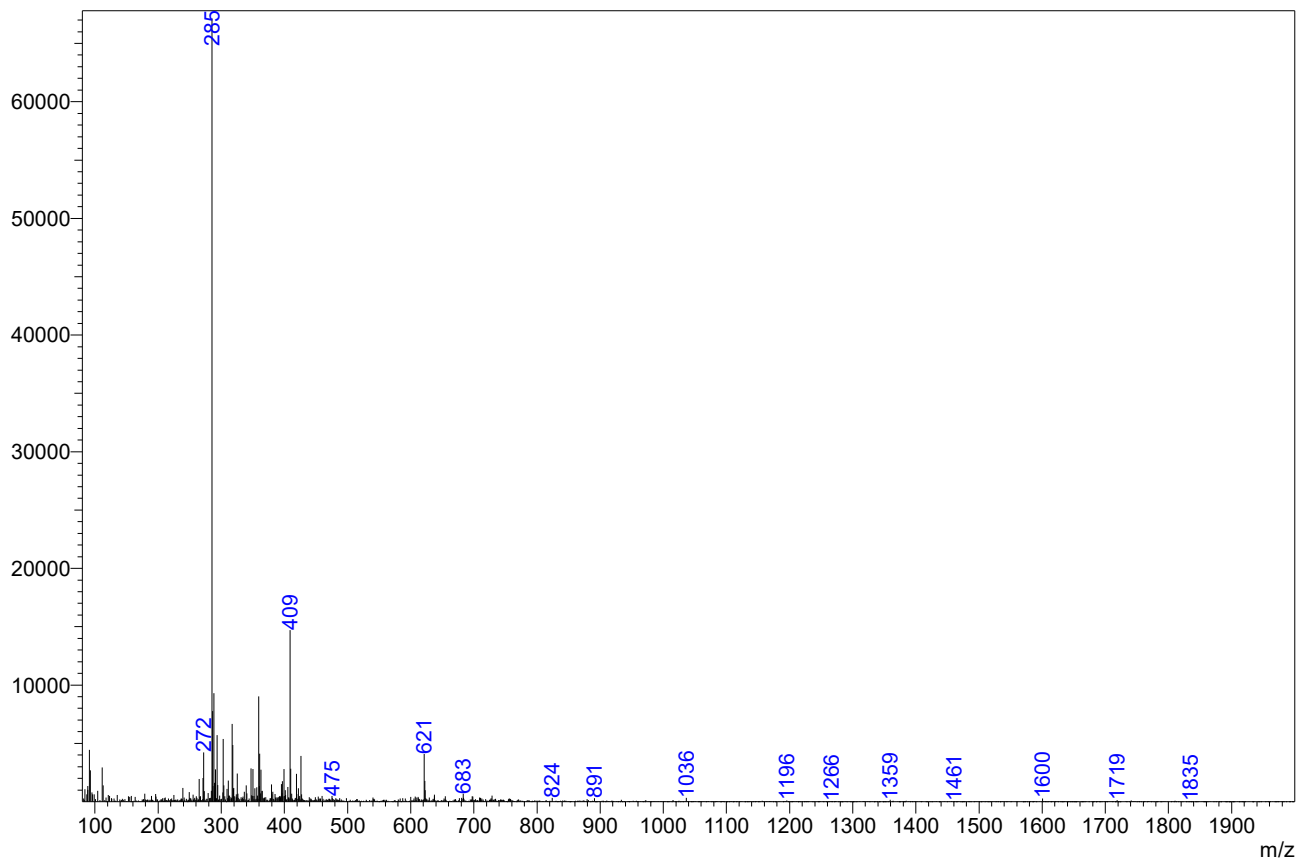

# ==== Shimadzu LabSolutions Browser Report ====

Ret. Time: 1-1(E+) 1-2(E-) [0.200->0.707]-[0.133->1.153]  
Inten.

MS Spectrum(DO-209.lcd)

Compound 13

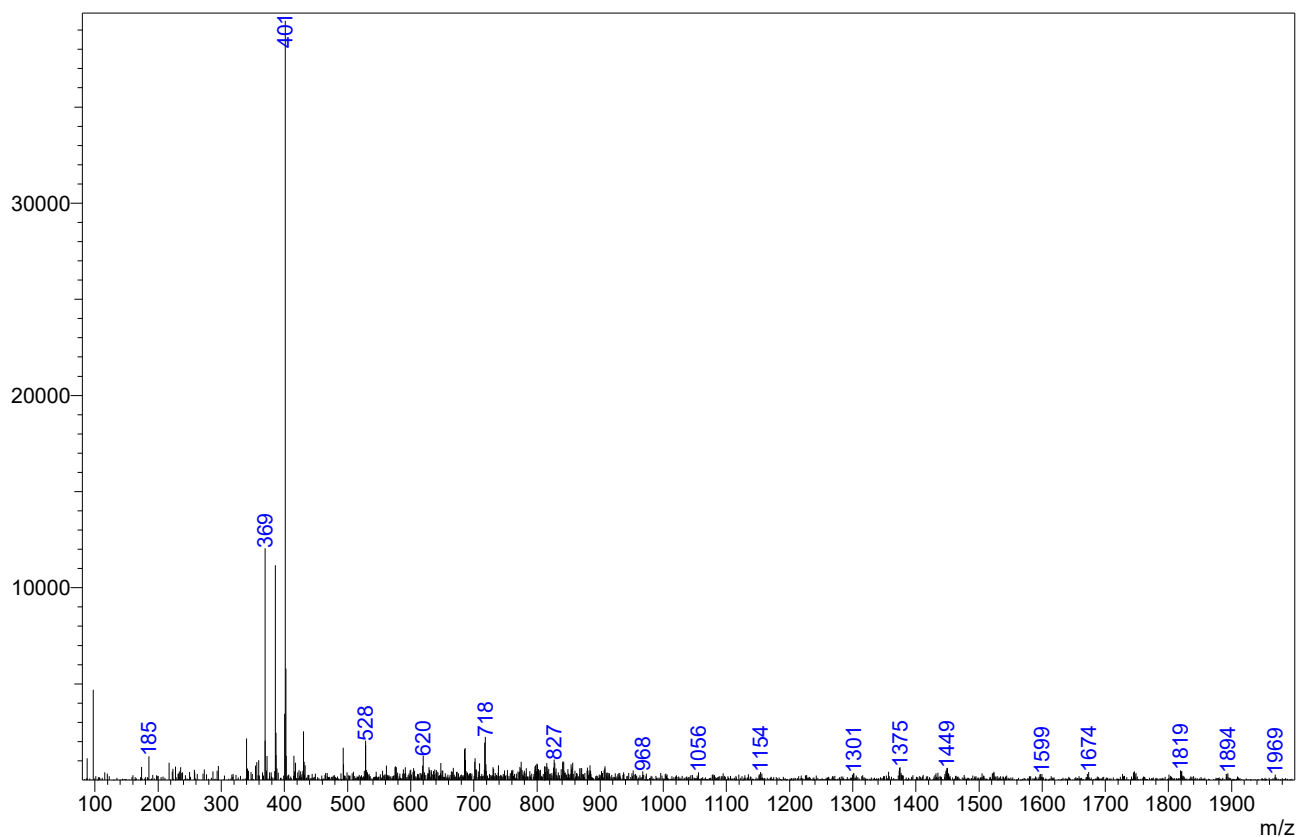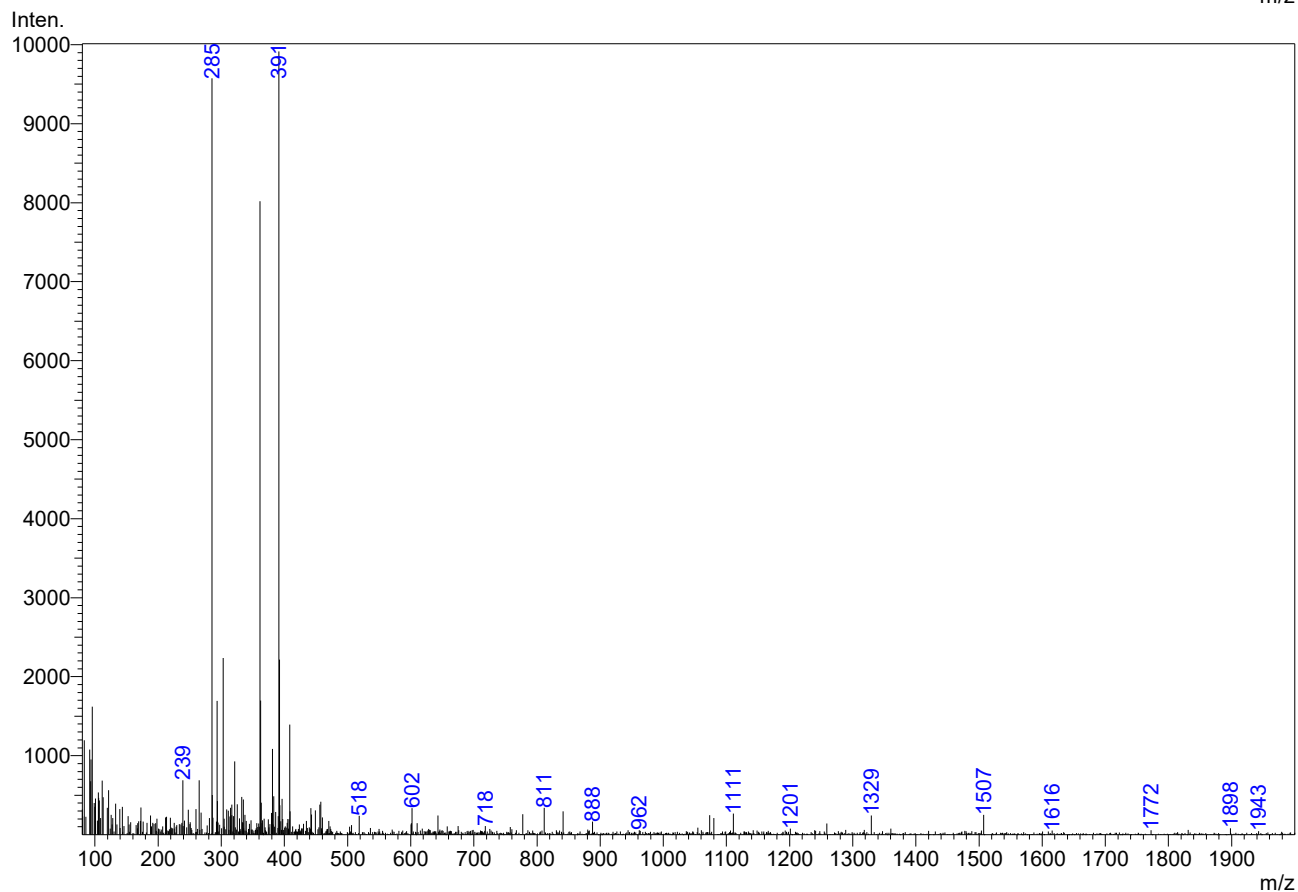

Supplement: Supplementary file 1 [file pharmaceuticals-15-01136-s001.zip › Supplementary material R1.pdf]
